# Supplementary material for: Development of a photoenzymatic one-pot hybrid system for the direct synthesis of 3,3-disubstituted indole-2-ketones from N-methyl indoles
Source: Royal Society of Chemistry journal article supplement (doi:10.1039/d4qo00371c), 2024-01-01

# Development of a photoenzymatic one-pot hybrid system for the direct synthesis of 3, 3-disubstituted indole-2-ketone from *N*-methyl indole

Yao Yao <sup>a,#</sup>, Yuan Yu <sup>a,#</sup>, Ming-Liang Shi <sup>a</sup>, Xin-Yue Fan <sup>a</sup>, Ru-De Lin <sup>a</sup>, Kun Li <sup>a</sup>, Wen-Dian Li <sup>b,c</sup>, Fei-Yan Tao <sup>b,c,\*</sup>, Na Wang <sup>a,\*</sup>

<sup>a</sup>Key Laboratory of Green Chemistry & Technology, Ministry of Education, College of Chemistry, Sichuan University, Chengdu 610064, P. R. China

<sup>b</sup>Harmful Components and Tar Reduction in Cigarette Key Laboratory of Sichuan Province, China Tobacco Sichuan Industrial Co., Ltd., Chengdu 610066, China

<sup>c</sup>Sichuan Sanlian New Material Co., Ltd., Chengdu 610041, China

# These authors contributed equally to this work

E-mail: taofeiyan@163.com (Fei-Yan Tao); wnchem@scu.edu.cn (Na Wang)

## Table of Content

|                                                                               |    |
|-------------------------------------------------------------------------------|----|
| 1. General information .....                                                  | 2  |
| 2. Experimental Procedure .....                                               | 2  |
| 3. Synthesis of substrates.....                                               | 2  |
| 4. The investigation of optimal conditions for the reaction.....              | 3  |
| 5. Experimental data for the substituted indoles .....                        | 6  |
| 6. Experimental data for the 3-acetyl-3-hydroxy-2-oxindoles derivatives ..... | 8  |
| 7. References.....                                                            | 13 |
| 8. Spectral data.....                                                         | 14 |

## 1. General information

All enzymes were purchased from Sigma-Aldrich Co. LLC (US), or Aladdin Co., Ltd. (Shanghai, China). All reagents were used without further purification unless otherwise noted. All the solvents were either HPLC or spectroscopic grade in the optical spectroscopic studies. The NMR spectra were obtained on an Agilent 400-MR DD2 spectrometer. The  $^1\text{H}$ NMR (400 MHz) chemical shifts were measured relative to  $\text{CDCl}_3$  as the internal reference ( $\text{CDCl}_3$ :  $\delta=7.26$  ppm). The  $^{13}\text{C}$  NMR (100 MHz) chemical shifts were given using  $\text{CDCl}_3$  as the internal standard ( $\text{CDCl}_3$ :  $\delta=76.8\sim 77.1$  ppm). HPLC experiments were performed on an Agilent instrument using an OD-3 column with n-hexane/i-PrOH = 95:5 (v/v), 1.0 mL/min,  $\lambda_{\text{max}} = 254$  nm, and 30 °C. High-resolution mass spectra (HR-MS) were obtained with a Waters-Q-TOF-Premier (ESI). Absorption spectra were recorded on a Hitachi PharmaSpec UV-1900 UV-Visible Spectrophotometer. All reactions were performed on a PL-SX100A multichannel light reactor.

## 2. Experimental Procedure

Photo-enzymatic indole oxidation-aldol reaction.

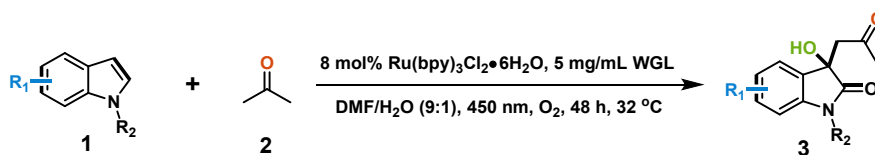

Indole (0.2 mmol), acetone (4 mmol),  $\text{Ru}(\text{bpy})_3\text{Cl}_2 \cdot 6\text{H}_2\text{O}$  (8 mmol%), WGL (5 mg/mL) were dissolved in DMF/ $\text{H}_2\text{O}$  (1.8 mL/0.2 mL) stirred in a quartz tube irradiated by a 450 nm LED lamp (10 W) at 32 °C,  $\text{O}_2$  atmosphere for 48 h. When the reaction was finished, the yields were determined by HPLC with the product sample.

## 3. Synthesis of substrates

General procedure for the synthesis of N-protected indoles from substituted indoles with alkyl bromides (iodomethane used for methyl-protected indoles).

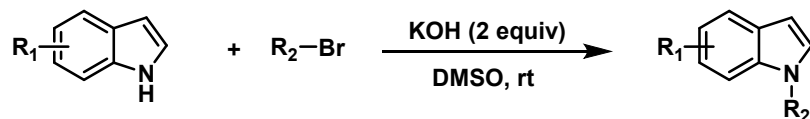

A 50 mL round-bottom flask was charged with substituted indoles (5 mmol), KOH (10.0 mmol), 20 mL of DMSO, and alkyl bromides (10.0 mmol). The reaction mixture was stirred at room temperature and monitored by TLC. Upon completion, the reaction mixture was quenched with water (20 mL). The mixture was extracted with ethyl acetate (3×30 mL). The combined organic phases were dried over anhydrous MgSO<sub>4</sub>. The product was purified by silica gel chromatography with petroleum ether/EtOAc.

#### 4. The investigation of optimal conditions for the reaction

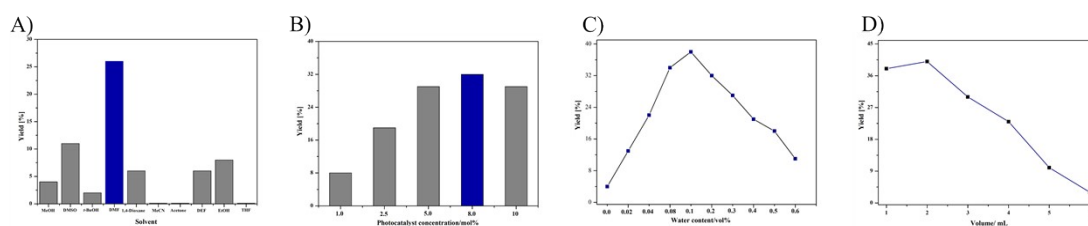

**Figure S1** Influence of medium and the amount of photocatalyst on reaction system. A) **1a** (0.3 mmol), **2** (7 mmol), BSA (20 mg/mL), Mes-Acr<sup>+</sup>-Me (8 mol%), in solvent/H<sub>2</sub>O (v/v 9:1, 1 mL), 450 nm LED, O<sub>2</sub>, 32 °C, 48 h. B) **1a** (0.3 mmol), **2** (7 mmol), BSA (20 mg/mL), Mes-Acr<sup>+</sup>-Me (X mol%), in DMF/H<sub>2</sub>O (v/v 9:1, 1 mL), 450 nm LED, O<sub>2</sub>, 32 °C, 48 h. C) **1a** (0.3 mmol), **2** (7 mmol), BSA (20 mg/mL), Mes-Acr<sup>+</sup>-Me (8 mol%), in DMF/H<sub>2</sub>O (v/v, 1 mL), 450 nm LED, O<sub>2</sub>, 32 °C, 48 h. D) **1a** (0.3 mmol), **2** (7 mmol), BSA (20 mg/mL), Mes-Acr<sup>+</sup>-Me (8 mol%), in DMF/H<sub>2</sub>O (v/v 9:1, X mL), 450 nm LED, O<sub>2</sub>, 32 °C, 48 h.

**Table S1** Enzyme screening <sup>a</sup>

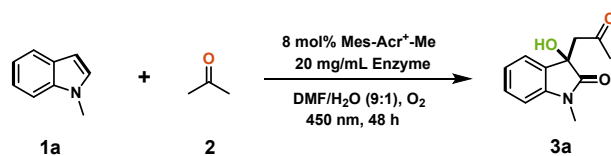

| Entry | Enzyme                                    | Yield (%) <sup>b</sup> |
|-------|-------------------------------------------|------------------------|
| 1     | Bovine serum albumin (BSA)                | 40                     |
| 2     | Lipase from <i>porcine pancreas</i> (PPL) | 8                      |
| 3     | Lipase from wheat germ (WGL)              | 55                     |
| 4     | Lipase from <i>Candida rugosa</i> (CRL)   | 49                     |

|   |                                                |    |
|---|------------------------------------------------|----|
| 5 | Trypsin                                        | 39 |
| 6 | Lipase B from <i>Candida antarctica</i> (CALB) | 41 |
| 7 | Lipase from <i>Mucor miehei</i> (MML)          | 8  |
| 8 | Lipase from <i>Bacillus Pumilu</i> (BPL)       | 51 |

<sup>a</sup>Reaction conditions: **1a** (0.3 mmol), **2** (7 mmol), enzyme (20 mg/mL), Mes-Acr<sup>+</sup>-Me (8 mol%), in DMF/H<sub>2</sub>O (v/v 9:1, 2 mL), 450 nm LED, O<sub>2</sub>, 32 °C, 48 h. <sup>b</sup>Determined by High Performance Liquid Chromatography (HPLC) with product sample.

**Table S2** Photocatalyst screening <sup>a</sup>

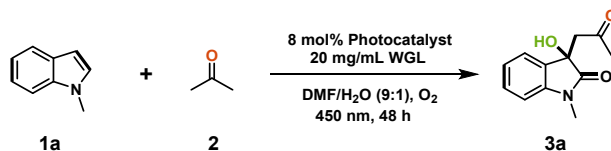

| Entry | Photocatalyst                                           | Yield (%) <sup>b</sup> |
|-------|---------------------------------------------------------|------------------------|
| 1     | 4CzIPN                                                  | 42                     |
| 2     | Eosin Y                                                 | 65                     |
| 3     | SAS                                                     | 17                     |
| 4     | Solvent Red 43                                          | 53                     |
| 5     | Ru(bpy) <sub>3</sub> Cl <sub>2</sub> •6H <sub>2</sub> O | 79                     |
| 6     | Mes-Acr <sup>+</sup> -Ph                                | 23                     |
| 7     | Mes-Acr <sup>+</sup> -Me                                | 52                     |
| 8     | Rose Bengal                                             | 15                     |
| 9     | Phloxine B                                              | 73                     |
| 10    | Rhodamine B                                             | 15                     |

<sup>a</sup> Reaction conditions: **1a** (0.3 mmol), **2** (7 mmol), WGL (20 mg/mL), photocatalysts (8 mol%), in DMF/H<sub>2</sub>O (v/v 9:1, 2 mL), 450 nm LED, O<sub>2</sub>, 32 °C, 48 h. <sup>b</sup> Determined by High Performance Liquid Chromatography (HPLC) with product sample.

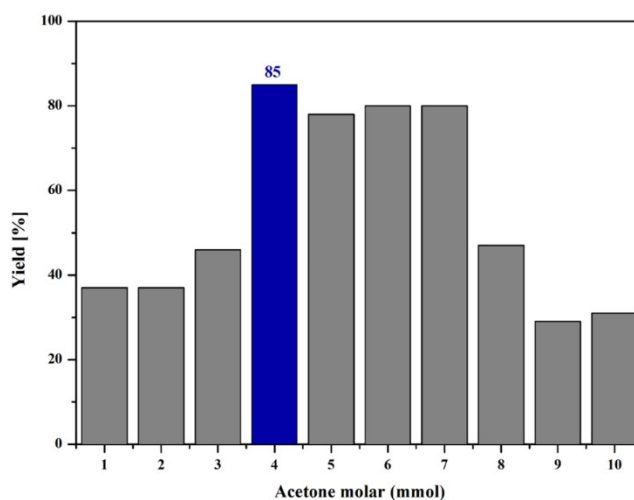

**Figure S2** The effect of acetone molar on the reaction. Reaction conditions: **1a** (0.3 mmol), **2** (x

mmol), WGL (5 mg/mL), Ru(bpy)<sub>3</sub>Cl<sub>2</sub>•6H<sub>2</sub>O (8 mol%), in DMF/H<sub>2</sub>O (v/v 9:1, 2 mL), 450 nm LED, O<sub>2</sub>, 32 °C, 48 h.

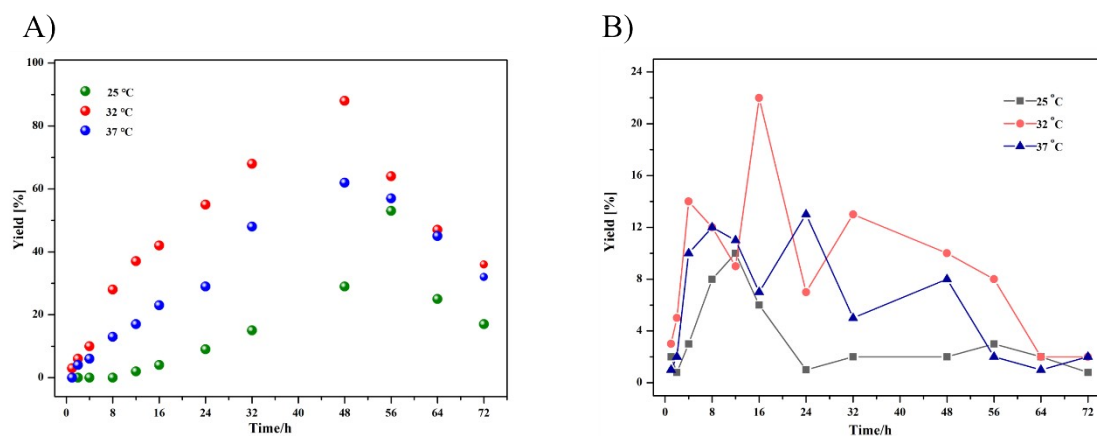

**Figure S3** Time curve. A) Time curve of 3-acetyl-3-hydroxy-2-oxindole; B) Time curve of N-methylisatin.

**Table S3** N-methylisatin as starting material <sup>a</sup>

| Entry | Variations conditions | from standard | Yield (%) <sup>b</sup> |
|-------|-----------------------|---------------|------------------------|
| 1     | none                  |               | 75                     |
| 2     | only light            |               | 37                     |
| 3     | no WGL                |               | 40                     |
| 4     | no PC                 |               | 90                     |

<sup>a</sup> Reaction conditions: **1a** (0.3 mmol), **2** (7 mmol), WGL (5 mg/mL), Ru(bpy)<sub>3</sub>Cl<sub>2</sub>•6H<sub>2</sub>O (8 mol%), in DMF/H<sub>2</sub>O (v/v 9:1, 2 mL), 450 nm LED, O<sub>2</sub>, 32 °C, 48 h. <sup>b</sup> Determined by High Performance Liquid Chromatography (HPLC) with product sample. PC = Ru(bpy)<sub>3</sub>Cl<sub>2</sub>•6H<sub>2</sub>O.

**Table S4** The effect of amino acids <sup>a</sup>

| Entry | Conditions | Yield (%) <sup>b</sup> |
|-------|------------|------------------------|
| 1     | Serine     | <5%                    |
| 2     | Histidine  | 7%                     |

|   |                                    |     |
|---|------------------------------------|-----|
| 3 | Aspartic acid                      | 7%  |
| 4 | Serine + Histidine                 | <5% |
| 5 | Serine + Aspartic acid             | <5% |
| 6 | Histidine + Aspartic acid          | 5%  |
| 7 | Serine + Histidine + Aspartic acid | <1% |
| 8 | WGL                                | 85% |

<sup>a</sup> Reaction conditions: **1a** (0.3 mmol), **2** (7 mmol), amino acid (2.0 equiv), Ru(bpy)<sub>3</sub>Cl<sub>2</sub>•6H<sub>2</sub>O (8 mol%), in DMF/H<sub>2</sub>O (v/v 9:1, 2 mL), 450 nm LED, O<sub>2</sub>, 32 °C, 48 h. <sup>b</sup> Determined by High Performance Liquid Chromatography (HPLC) with product sample.

## 5. Experimental data for the substituted indoles

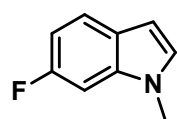

<sup>1</sup>H NMR (400 MHz, CDCl<sub>3</sub>) δ 7.53-7.49 (m, 1H), 7.02-6.97 (m, 2H), 6.86 (t, *J* = 12.0 Hz, 1H), 6.45 (s, 1H), 3.73 (s, 3H). <sup>13</sup>C NMR (100 MHz, CDCl<sub>3</sub>) δ 160.93, 158.57, 129.81, 121.44, 107.98 (d, *J*<sub>CF</sub> = 25 Hz), 101.06, 95.54 (d, *J*<sub>CF</sub> = 25 Hz), 32.92. The spectroscopic characterization corresponded with the data reported in the literature.<sup>[1]</sup>

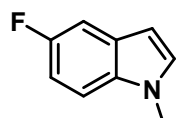

<sup>1</sup>H NMR (400 MHz, CDCl<sub>3</sub>) δ 7.28 (d, *J* = 8 Hz, 1H), 7.24-7.20 (m, 1H), 7.09 (s, 1H), 6.98 (t, *J* = 12 Hz, 1H), 6.44 (s, 1H), 3.77 (s, 3H). <sup>13</sup>C NMR (100 MHz, CDCl<sub>3</sub>) δ 159.00, 156.67, 133.37, 130.37, 128.57, 109.88 (d, *J*<sub>CF</sub> = 15 Hz), 105.48 (d, *J*<sub>CF</sub> = 24 Hz), 100.78, 33.04. The spectroscopic characterization corresponded with the data reported in the literature.<sup>[1]</sup>

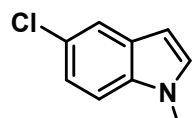

<sup>1</sup>H NMR (400 MHz, CDCl<sub>3</sub>) δ 7.57 (s, 1H), 7.23-7.15 (m, 2H), 7.06 (d, *J* = 4.0 Hz, 1H), 6.42 (d, *J* = 4.0 Hz, 1H), 3.76 (s, 3H). <sup>13</sup>C NMR (100 MHz, CDCl<sub>3</sub>) δ 135.06, 130.09, 129.37, 125.03, 121.73, 120.14, 110.18, 100.54, 33.00. The spectroscopic characterization corresponded with the data reported in the literature.<sup>[1]</sup>

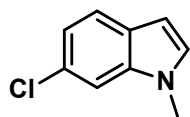

$^1\text{H}$  NMR (400 MHz,  $\text{CDCl}_3$ )  $\delta$  7.52 (d,  $J = 8.0$  Hz, 1H), 7.31 (s, 1H), 7.08 (d,  $J = 8.0$  Hz, 1H), 7.03 (d,  $J = 4.0$  Hz, 1H), 6.46 (d,  $J = 4$  Hz, 1H), 3.73 (s, 1H).  $^{13}\text{C}$  NMR (100 MHz,  $\text{CDCl}_3$ )  $\delta$  137.08, 129.50, 127.49, 126.96, 121.66, 119.94, 109.24, 101.14, 32.86. The spectroscopic characterization corresponded with the data reported in the literature.<sup>[1]</sup>

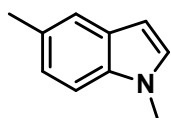

$^1\text{H}$  NMR (400 MHz,  $\text{CDCl}_3$ )  $\delta$  7.56 (s, 1H), 7.33 (d,  $J = 4$  Hz, 1H), 7.19 (d,  $J = 8$  Hz, 1H), 7.10 (d,  $J = 4$  Hz, 1H), 6.53 (d,  $J = 4$  Hz, 1H), 3.82 (s, 3H), 2.60 (s, 3H).  $^{13}\text{C}$  NMR (100 MHz,  $\text{CDCl}_3$ )  $\delta$  135.23, 128.95, 128.84, 128.49, 123.21, 120.60, 109.00, 100.36, 32.88, 21.57. The spectroscopic characterization corresponded with the data reported in the literature.<sup>[1]</sup>

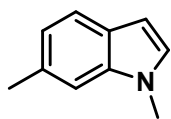

$^1\text{H}$  NMR (400 MHz,  $\text{CDCl}_3$ )  $\delta$  7.51 (d,  $J = 4.0$  Hz, 1H), 7.12 (s, 1H), 6.98-6.98-6.94 (m, 2H), 6.44 (d,  $J = 4.0$  Hz, 1H), 3.75 (s, 3H), 2.50 (s, 3H).  $^{13}\text{C}$  NMR (100 MHz,  $\text{CDCl}_3$ )  $\delta$  137.03, 131.24, 128.18, 126.21, 121.01, 120.44, 109.15, 100.60, 32.72, 21.90. The spectroscopic characterization corresponded with the data reported in the literature.<sup>[1]</sup>

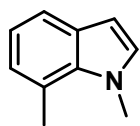

$^1\text{H}$  NMR (400 MHz,  $\text{CDCl}_3$ )  $\delta$  7.46 (d,  $J = 8.0$  Hz, 1H), 6.99-6.90 (m, 3H), 6.44 (d,  $J = 4$  Hz, 1H), 4.04 (s, 3H), 2.78 (s, 3H).  $^{13}\text{C}$  NMR (100 MHz,  $\text{CDCl}_3$ )  $\delta$  135.37, 130.37, 129.58, 124.11, 121.17, 119.54, 119.07, 100.86, 36.80, 19.77. The spectroscopic characterization corresponded with the data reported in the literature.<sup>[1]</sup>

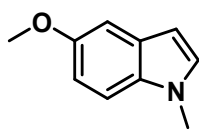

$^1\text{H}$  NMR (400 MHz,  $\text{CDCl}_3$ )  $\delta$  7.22 (d,  $J = 8.0$  Hz, 1H), 7.11 (d,  $J = 4.0$  Hz, 1H), 7.03 (d,  $J = 4.0$  Hz, 1H), 6.91 (dd,  $J = 4.0$  Hz, 8.0 Hz, 1H), 3.86 (s, 3H),

3.75 (s, 3H).  $^{13}\text{C}$  NMR (100 MHz,  $\text{CDCl}_3$ )  $\delta$  153.94, 132.08, 129.31, 128.73, 111.84, 109.93, 102.42, 100.34, 55.87, 32.98. The spectroscopic characterization corresponded with the data reported in the literature.<sup>[1]</sup>

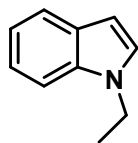

$^1\text{H}$  NMR (400 MHz,  $\text{CDCl}_3$ )  $\delta$  7.63 (d,  $J = 8.0$  Hz, 1H), 7.35 (d,  $J = 8.0$  Hz, 1H), 7.21 (t,  $J = 8.0$  Hz, 1H), 7.12-7.08 (m, 2H), 4.18 (dd,  $J = 8.0$  Hz, 12.0 Hz 2H), 1.46 (t,  $J = 8.0$  Hz, 3H).  $^{13}\text{C}$  NMR (100 MHz,  $\text{CDCl}_3$ )  $\delta$  135.62, 128.57, 126.97, 121.28, 120.93, 119.16, 109.23, 100.95, 40.93, 15.47. The spectroscopic characterization corresponded with the data reported in the literature.<sup>[1]</sup>

## 6. Experimental data for the 3-acetyl-3-hydroxy-2-oxindoles derivatives

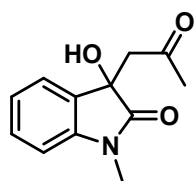

**3a**;  $^1\text{H}$  NMR (400 MHz,  $\text{CDCl}_3$ )  $\delta$  7.26-7.35 (m, 2H), 7.07 (t,  $J = 8.0$  Hz, 1H), 6.84 (d,  $J = 8.0$  Hz, 1H), 4.41 (s, 1H), 3.20 (s, 3H), 3.02 (m, 2H), 2.18 (s, 3H).  $^{13}\text{C}$  NMR (100 MHz,  $\text{CDCl}_3$ )  $\delta$  207.50, 181.49, 143.49, 129.99, 129.69, 123.81, 123.10, 108.56, 74.18, 48.64, 31.38, 26.26. HRMS (ESI)  $m/z$ :  $[\text{M} + \text{Na}]^+$  Calcd for  $\text{C}_{12}\text{H}_{13}\text{NO}_3\text{Na}^+$  242.0788; Found 242.0785. The spectroscopic characterization corresponded with the data reported in the literature.<sup>[2]</sup>

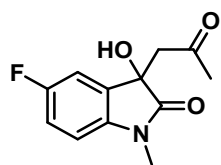

**3b**;  $^1\text{H}$  NMR (400 MHz,  $\text{CDCl}_3$ )  $\delta$  7.11 (d,  $J = 8.0$  Hz, 1H), 7.00 (t,  $J = 8.0$  Hz, 1H), 6.75 (dd,  $J = 8.0, 4.0$  Hz, 1H), 4.50 (dd,  $J = 4.0$  Hz, 20.0 Hz, 1H), 3.19 (d,  $J = 16.0$  Hz, 1H), 3.17 (s, 3H), 2.93 (d,  $J = 20.0$  Hz, 1H), 2.16 (s, 3H).  $^{13}\text{C}$  NMR (100 MHz,  $\text{CDCl}_3$ )  $\delta$  207.28, 175.89, 160.60, 158.19, 135.34 (d,  $J_{\text{CF}} = 817.0$  Hz), 116.10 (d,  $J_{\text{CF}} = 12.5$  Hz), 112.30 (d,  $J_{\text{CF}} = 25.0$  Hz), 109.17 (d,  $J_{\text{CF}} = 8.0$  Hz), 74.22, 48.74, 3.26, 26.43.  $^{19}\text{F}$  (376 MHz,  $\text{CDCl}_3$ )  $\delta$  -119.51 – -119.57 (m). HRMS



(ESI) m/z: [M + Na]<sup>+</sup> Calcd for C<sub>12</sub>H<sub>12</sub>FNO<sub>3</sub>Na<sup>+</sup> 260.0693; Found 260.0694.

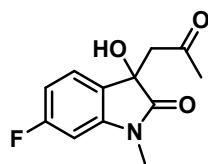

**3c**; <sup>1</sup>H NMR (400 MHz, CDCl<sub>3</sub>) δ 7.31 (q, *J* = 8.0 Hz, 1H), 6.75-6.70 (m, 1H), 6.59-6.56 (m, 1H), 4.27 (s, 1H), 3.19 (d, *J* = 20.0 Hz, 1H), 3.18 (s, 3H), 2.94 (d, *J* = 16.0 Hz, 1H), 2.17 (s, 3H). <sup>13</sup>C NMR (100 MHz, CDCl<sub>3</sub>) δ 207.40, 176.32, 165.32, 162.86, 125.21 (d, *J*<sub>CF</sub> = 10.0 Hz), 109.19, 108.95, 97.54 (d, *J*<sub>CF</sub> = 27.0 Hz), 73.71, 48.77, 31.30, 26.42. <sup>19</sup>F (376 MHz, CDCl<sub>3</sub>) δ -109.24 – -109.30 (m). HRMS (ESI) m/z: [M + Na]<sup>+</sup> Calcd for C<sub>12</sub>H<sub>12</sub>FNO<sub>3</sub>Na<sup>+</sup> 260.0693; Found 260.0696.

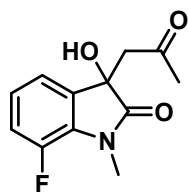

**3d**; <sup>1</sup>H NMR (400 MHz, CDCl<sub>3</sub>) δ 7.15-7.13 (m, 1H), 7.07-7.04 (m, 1H), 7.03-6.96 (m, 1H), 4.46 (s, 1H), 3.41 (d, *J* = 2.8 Hz, 3H), 3.19 (d, *J* = 16.0 Hz, 1H), 2.99 (d, *J* = 16.0 Hz, 1H), 2.16 (s, 3H). <sup>13</sup>C NMR (100 MHz, CDCl<sub>3</sub>) δ 207.21, 175.49, 149.07, 146.63, 132.54, 130.19, 119.60 (d, *J*<sub>CF</sub> = 3.0 Hz), 118.12 (d, *J*<sub>CF</sub> = 20.0 Hz), 74.10, 48.96, 31.28, 28.88. <sup>19</sup>F (376 MHz, CDCl<sub>3</sub>) δ -135.89 (td, *J* = 7.52, 3.76 Hz). HRMS (ESI) m/z: [M + Na]<sup>+</sup> Calcd for C<sub>12</sub>H<sub>12</sub>FNO<sub>3</sub>Na<sup>+</sup> 260.0693; Found 260.0686.

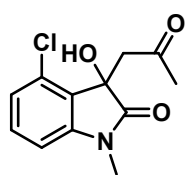

**3e**; <sup>1</sup>H NMR (400 MHz, CDCl<sub>3</sub>) δ 7.26 (t, *J* = 8.0 Hz, 1H), 6.99 (d, *J* = 8.0 Hz, 1H), 6.75 (d, *J* = 4.0 Hz, 1H), 3.81 (s, 1H), 3.66 (d, *J* = 20.0 Hz, 1H), 3.38 (d, *J* = 20 Hz, 1H). <sup>13</sup>C NMR (100 MHz, CDCl<sub>3</sub>) δ 206.03, 175.94, 145.98, 131.18, 131.01, 125.34, 123.96, 74.54, 47.49, 30.81, 26.51. HRMS (ESI) m/z: [M + Na]<sup>+</sup> Calcd for C<sub>12</sub>H<sub>12</sub>ClNO<sub>3</sub>Na<sup>+</sup> 276.0398; Found 276.0396.

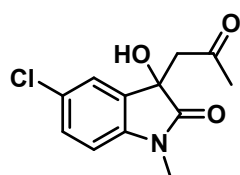

**3f**; <sup>1</sup>H NMR (400 MHz, CDCl<sub>3</sub>) δ 7.33 (s, 1H), 7.29 (d, *J* = 8.0 Hz,

1H), 6.76 (d,  $J = 8.0$  Hz, 1H), 3.22 (d,  $J = 20.0$  Hz, 1H), 3.17 (s, 3H), 3.01 (d,  $J = 16.0$  Hz, 1H), 2.15 (s, 3H).  $^{13}\text{C}$  NMR (100 MHz,  $\text{CDCl}_3$ )  $\delta$  206.96, 175.94, 142.17, 131.31, 129.79, 128.46, 124.43, 109.59, 73.95, 48.98, 31.09, 26.42. HRMS (ESI)  $m/z$ :  $[\text{M} + \text{Na}]^+$  Calcd for  $\text{C}_{12}\text{H}_{12}\text{ClNO}_3\text{Na}^+$  276.0398; Found 276.0396.

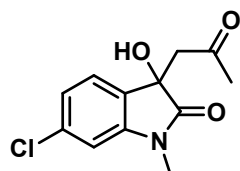

**3g**;  $^1\text{H}$  NMR (400 MHz,  $\text{CDCl}_3$ )  $\delta$  7.27 (d,  $J = 8.0$  Hz, 1H), 7.03 (d,  $J = 8.0$  Hz, 1H), 6.83 (s, 1H), 4.41 (s, 1H), 3.19 (d,  $J = 8.0$  Hz, 1H), 3.18 (s, 3H), 2.96 (d,  $J = 20.0$  Hz, 1H), 2.16 (s, 3H).  $^{13}\text{C}$  NMR (100 MHz,  $\text{CDCl}_3$ )  $\delta$  207.27, 176.09, 144.81, 135.83, 128.03, 124.83, 122.89, 109.39, 73.71, 48.80, 31.25, 26.40. HRMS (ESI)  $m/z$ :  $[\text{M} + \text{Na}]^+$  Calcd for  $\text{C}_{12}\text{H}_{12}\text{ClNO}_3\text{Na}^+$  276.0398; Found 276.0398. The spectroscopic characterization corresponded with the data reported in the literature.<sup>[3]</sup>

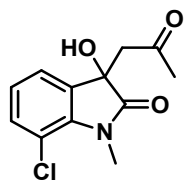

**3h**;  $^1\text{H}$  NMR (400 MHz,  $\text{CDCl}_3$ )  $\delta$  7.26-7.23 (m, 2H), 6.97 (t,  $J = 8$  MHz, 1H), 4.48 (s, 1H), 3.57 (s, 3H), 3.16 (d,  $J = 20.0$  Hz, 1H), 2.98 (d,  $J = 16.0$  Hz, 1H), 2.16 (s, 3H).  $^{13}\text{C}$  NMR (100 MHz,  $\text{CDCl}_3$ )  $\delta$  207.19, 176.58, 139.46, 132.43, 132.27, 123.94, 122.25, 116.03, 73.54, 48.91, 31.31, 29.74. HRMS (ESI)  $m/z$ :  $[\text{M} + \text{Na}]^+$  Calcd for  $\text{C}_{12}\text{H}_{12}\text{ClNO}_3\text{Na}^+$  276.0398; Found 276.0400.

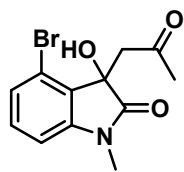

**3i**;  $^1\text{H}$  NMR (400 MHz,  $\text{CDCl}_3$ )  $\delta$  7.16 (q,  $J = 8$  Hz, 2H), 6.78 (d,  $J = 8.0$  Hz, 1H), 4.01 (s, 1H), 3.76 (d,  $J = 20.0$  Hz, 1H), 3.35 (d,  $J = 16.0$  Hz, 1H), 3.19 (s, 3H), 2.11 (s, 3H).  $^{13}\text{C}$  NMR (100 MHz,  $\text{CDCl}_3$ )  $\delta$  205.86, 176.11, 146.23, 131.30, 127.14, 126.97, 118.92, 107.68, 75.07, 47.60, 30.73, 26.44. HRMS (ESI)  $m/z$ :  $[\text{M} + \text{Na}]^+$  Calcd for  $\text{C}_{12}\text{H}_{12}\text{BrNO}_3\text{Na}^+$  319.9893; Found 319.9895.

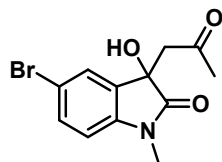

**3j**;  $^1\text{H NMR}$  (400 MHz,  $\text{CDCl}_3$ )  $\delta$  7.46 (t,  $J = 8.0$  Hz, 2H), 6.72 (d,  $J = 8.0$  Hz, 1H), 4.45 (s, 1H), 3.20 (d,  $J = 16.0$  Hz, 1H), 3.18 (s, 3H), 2.97 (d,  $J = 16.0$  Hz, 1H), 2.18 (s, 3H).  $^{13}\text{C NMR}$  (100 MHz,  $\text{CDCl}_3$ )  $\delta$  207.24, 175.57, 142.63, 132.76, 131.64, 127.22, 115.74, 110.07, 73.98, 48.72, 31.19, 26.39. HRMS (ESI)  $m/z$ :  $[\text{M} + \text{Na}]^+$  Calcd for  $\text{C}_{12}\text{H}_{12}\text{BrNO}_3\text{Na}^+$  319.9893; Found 319.9880.

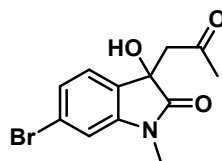

**3k**;  $^1\text{H NMR}$  (400 MHz,  $\text{CDCl}_3$ )  $\delta$  7.20 (q,  $J = 8.0$  Hz, 2H), 6.99 (s, 1H), 4.37 (s, 1H), 3.19 (d,  $J = 16.0$  Hz, 1H), 3.18 (s, 3H), 2.95 (d,  $J = 16.0$  Hz, 1H), 2.17 (s, 3H).  $^{13}\text{C NMR}$  (100 MHz,  $\text{CDCl}_3$ )  $\delta$  207.30, 175.93, 144.88, 128.56, 125.87, 125.61, 123.71, 112.17, 109.99, 73.77, 48.69, 31.25, 26.40. HRMS (ESI)  $m/z$ :  $[\text{M} + \text{Na}]^+$  Calcd for  $\text{C}_{12}\text{H}_{12}\text{BrNO}_3\text{Na}^+$  319.9893; Found 319.9887.

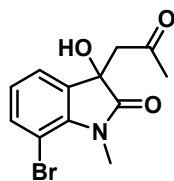

**3l**;  $^1\text{H NMR}$  (400 MHz,  $\text{CDCl}_3$ ) 7.42 (d,  $J = 8.0$  Hz, 1H), 7.28 (d,  $J = 8.0$  Hz, 1H), 6.90 (t,  $J = 8.0$  Hz, 1H), 4.46 (s, 1H), 3.58 (3H), 3.16 (d,  $J = 16.0$  Hz, 1H), 2.98 (d,  $J = 16.0$  Hz, 1H), 2.16 (s, 3H).  $^{13}\text{C NMR}$  (100 MHz,  $\text{CDCl}_3$ )  $\delta$  207.13, 176.83, 140.97, 135.62, 132.82, 124.32, 122.81, 102.90, 73.49, 48.98, 31.29, 29.97. HRMS (ESI)  $m/z$ :  $[\text{M} + \text{Na}]^+$  Calcd for  $\text{C}_{12}\text{H}_{12}\text{BrNO}_3\text{Na}^+$  319.9893; Found 319.9877.

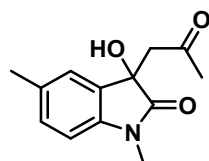

**3m**;  $^1\text{H NMR}$  (400 MHz,  $\text{CDCl}_3$ )  $\delta$  7.17 (s, 1H), 7.11 (d,  $J = 8.0$  Hz, 1H), 6.72 (d,  $J = 8.0$  Hz, 1H), 4.49 (s, 1H), 3.17 (d,  $J = 16.0$  Hz, 1H), 3.17 (s, 3H), 2.94 (d,  $J = 16.0$  Hz, 1H), 2.31 (s, 3H), 2.17 (s, 3H).  $^{13}\text{C NMR}$  (100 MHz,  $\text{CDCl}_3$ )  $\delta$  207.72, 176.08, 141.05, 132.77, 130.17, 129.65, 124.63, 108.34, 74.29, 48.72, 31.40, 26.30, 21.05. HRMS (ESI)  $m/z$ :  $[\text{M} + \text{Na}]^+$  Calcd for  $\text{C}_{13}\text{H}_{15}\text{NO}_3\text{Na}^+$  256.0944; Found

256.0946.

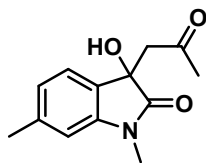

**3n**;  $^1\text{H NMR}$  (400 MHz,  $\text{CDCl}_3$ )  $\delta$  7.22 (d,  $J = 8.0$  Hz, 1H), 6.86 (d,  $J = 8.0$  Hz, 1H), 6.65 (s, 1H), 3.18 (d,  $J = 20.0$  Hz, 1H), 3.17 (s, 3H), 2.94 (d,  $J = 16.0$  Hz, 1H), 3.16 (s, 3H), 2.15 (s, 3H).  $^{13}\text{C NMR}$  (100 MHz,  $\text{CDCl}_3$ )  $\delta$  207.57, 176.50, 143.63, 140.40, 126.79, 123.57, 109.55, 74.04, 48.93, 31.37, 26.25, 21.90. HRMS (ESI)  $m/z$ :  $[\text{M} + \text{Na}]^+$  Calcd for  $\text{C}_{13}\text{H}_{15}\text{NO}_3\text{Na}^+$  256.0944; Found 256.0942.

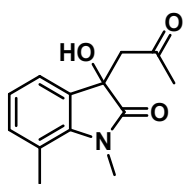

**3o**;  $^1\text{H NMR}$  (400 MHz,  $\text{CDCl}_3$ )  $\delta$  7.18 (d,  $J = 8.0$  Hz, 1H), 7.04 (d,  $J = 8.0$  Hz, 1H), 6.94 (t,  $J = 8.0$  Hz, 1H), 4.46 (s, 1H), 3.47 (s, 3H), 3.14 (d,  $J = 16.0$  Hz, 1H), 2.97 (d,  $J = 20.0$  Hz, 1H), 2.55 (s, 3H), 2.14 (s, 3H).  $^{13}\text{C NMR}$  (100 MHz,  $\text{CDCl}_3$ )  $\delta$  207.45, 177.07, 141.15, 133.74, 130.27, 123.08, 121.57, 120.27, 73.47, 49.05, 31.42, 29.71, 18.97. HRMS (ESI)  $m/z$ :  $[\text{M} + \text{Na}]^+$  Calcd for  $\text{C}_{13}\text{H}_{15}\text{NO}_3\text{Na}^+$  256.0944; Found 256.0944.

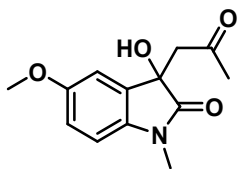

**3p**;  $^1\text{H NMR}$  (400 MHz,  $\text{CDCl}_3$ )  $\delta$  7.00 (s, 1H), 6.84 (d,  $J = 8.0$  Hz, 1H), 6.74 (d,  $J = 8.0$  Hz, 1H), 4.48 (s, 1H), 3.78 (s, 3H), 3.17 (d,  $J = 16.0$  Hz, 1H), 3.17 (s, 3H), 2.93 (d,  $J = 16.0$  Hz, 1H), 2.18 (s, 3H).  $^{13}\text{C NMR}$  (100 MHz,  $\text{CDCl}_3$ )  $\delta$  207.69, 175.77, 156.31, 136.78, 130.86, 114.20, 111.29, 109.01, 74.55, 55.82, 48.66, 31.42, 26.36. HRMS (ESI)  $m/z$ :  $[\text{M} + \text{Na}]^+$  Calcd for  $\text{C}_{13}\text{H}_{15}\text{NO}_4\text{Na}^+$  272.0893; Found 272.0896.

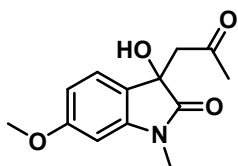

**3q**;  $^1\text{H NMR}$  (400 MHz,  $\text{CDCl}_3$ )  $\delta$  7.25 (d,  $J = 8.0$  Hz, 1H), 6.52 (d,  $J = 8.0$  Hz, 1H), 4.32 (s, 1H), 3.81 (s, 3H), 3.17 (d,  $J = 16.0$  Hz, 1H), 3.16 (s, 3H),

2.93 (d,  $J = 16.0$  Hz, 1H), 2.15 (s, 3H).  $^{13}\text{C}$  NMR (100 MHz,  $\text{CDCl}_3$ )  $\delta$  207.59, 176.66, 161.47, 144.99, 124.71, 121.68, 106.48, 96.70, 73.82, 55.53, 48.95, 31.37, 26.28. HRMS (ESI)  $m/z$ :  $[\text{M} + \text{Na}]^+$  Calcd for  $\text{C}_{13}\text{H}_{15}\text{NO}_4\text{Na}^+$  272.0893; Found 272.0895.

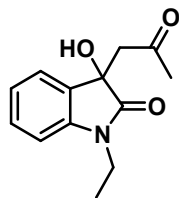

**3r**;  $^1\text{H}$  NMR (400 MHz,  $\text{CDCl}_3$ )  $\delta$  7.36 (d,  $J = 8.0$  Hz, 1H), 7.32 (t,  $J = 8.0$  Hz, 1H), 7.05 (t,  $J = 8.0$  Hz, 1H), 6.86 (d,  $J = 8.0$  Hz, 1H), 4.23 (s, 1H), 3.81-3.68 (m), 3.19 (d,  $J = 12$  Hz, 1H), 2.95 (d,  $J = 12.0$  Hz, 1H), 1.29 (t,  $J = 4.0$  Hz, 3H).  $^{13}\text{C}$  NMR (100 MHz,  $\text{CDCl}_3$ )  $\delta$  207.45, 175.62, 142.65, 129.90, 124.01, 122.90, 109.99, 108.72, 74.13, 48.83, 34.79, 31.35, 12.34. HRMS (ESI)  $m/z$ :  $[\text{M} + \text{Na}]^+$  Calcd for  $\text{C}_{13}\text{H}_{15}\text{NO}_3\text{Na}^+$  256.0944; Found 256.0946.

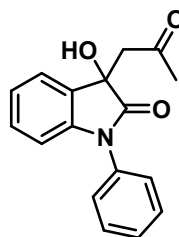

**3s**;  $^1\text{H}$  NMR (400 MHz,  $\text{CDCl}_3$ )  $\delta$  7.53 (t,  $J = 8.0$  Hz, 2H), 7.46-7.40 (m, 4H), 7.26 (t,  $J = 4.0$  Hz, 1H), 7.09 (t,  $J = 4.0$  Hz, 1H), 6.80 (d,  $J = 8.0$  Hz, 1H), 3.34 (d,  $J = 16.0$  Hz, 1H), 3.16 (d,  $J = 16.0$  Hz, 1H), 2.17 (s, 3H).  $^{13}\text{C}$  NMR (100 MHz,  $\text{CDCl}_3$ )  $\delta$  206.89, 175.85, 143.91, 134.04, 129.98, 129.68, 129.26, 128.29, 126.53, 123.97, 123.53, 109.92, 74.14, 49.72, 31.18. HRMS (ESI)  $m/z$ :  $[\text{M} + \text{Na}]^+$  Calcd for  $\text{C}_{17}\text{H}_{15}\text{NO}_3\text{Na}^+$  309.0944; Found 304.0945. The spectroscopic characterization corresponded with the data reported in the literature.<sup>[4]</sup>

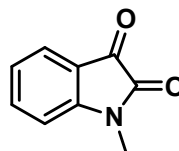

**1a'**;  $^1\text{H}$  NMR (400 MHz,  $\text{CDCl}_3$ )  $\delta$  7.62-7.58 (m, 2H), 7.12 (t,  $J = 8.0$  Hz, 1 H), 6.89 (d,  $J = 8$  Hz), 3.25 (s, 3H).  $^{13}\text{C}$   $\delta$  183.39, 158.24, 151.45, 138.50, 125.36, 123.93, 117.41, 110.00, 26.23. The spectroscopic characterization corresponded with the data reported in the literature.<sup>[5]</sup>

## 7. References

- 1 X. Li, X.-Y. Gu, Y.-J. Li and P.-X. Li, Aerobic Transition-Metal-Free Visible-Light Photoredox Indole C-3 Formylation Reaction, *ACS Catal.*, 2014, **4**, 1897-1900.
- 2 Q.-B. Zhang, W.-L. Jia, Y.-J. Ban, Y. Zheng, Q. Liu and L.-Z. Wu, Autoxidation/Aldol Tandem Reaction of 2-Oxindoles with Ketones: A Green Approach for the Synthesis of 3-Hydroxy-2-Oxindoles, *Chem-Eur. J.*, 2016, **22**, 2595-2598.
- 3 P.-J. Liu, J.-J. Guo, W.-T. Wei, X.-Z. Liu and P.-H. Sun, Iodine-Catalyzed Oxidation of N-Substituted Indoles by using Chloramine-B: A Facile and Practical Approach to Isatins, *Eur. J. Chem.*, 2016, **2016**, 2105-2109.
- 4 G. Gentile, M. Mamone, C. Rosso, F. Amato, C. Lanfrit, G. Filippini and M. Prato, Tailoring the Chemical Structure of Nitrogen-Doped Carbon Dots for Nano-Aminocatalysis in Aqueous Media, *ChemSusChem*, 2023, **16**, e202202399.
- 5 A. Paul, A. Segupta and S. Yadav, Visible-Light Driven Acetoxylation and Dioxygenation of Indoles via Electron Donor-Acceptor Complex, *Chem. Commun.*, **59**, 7455-7458.

## 8. Spectral data.

### 5-fluoro-N-methyl-indole

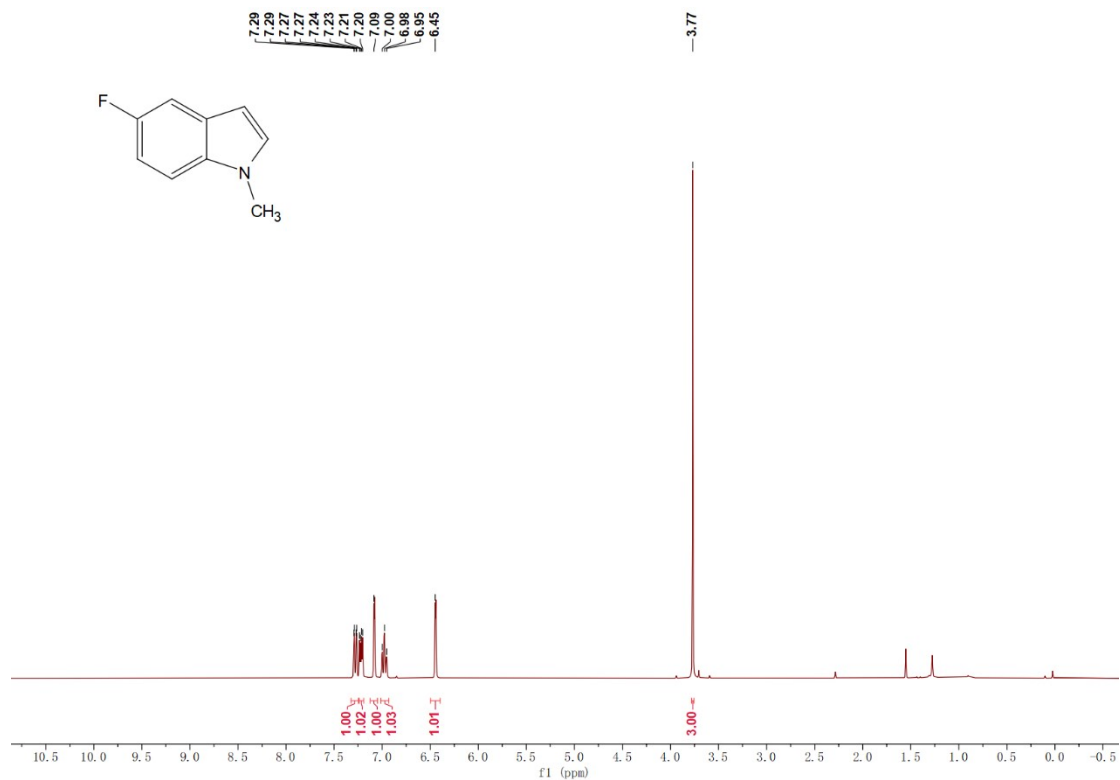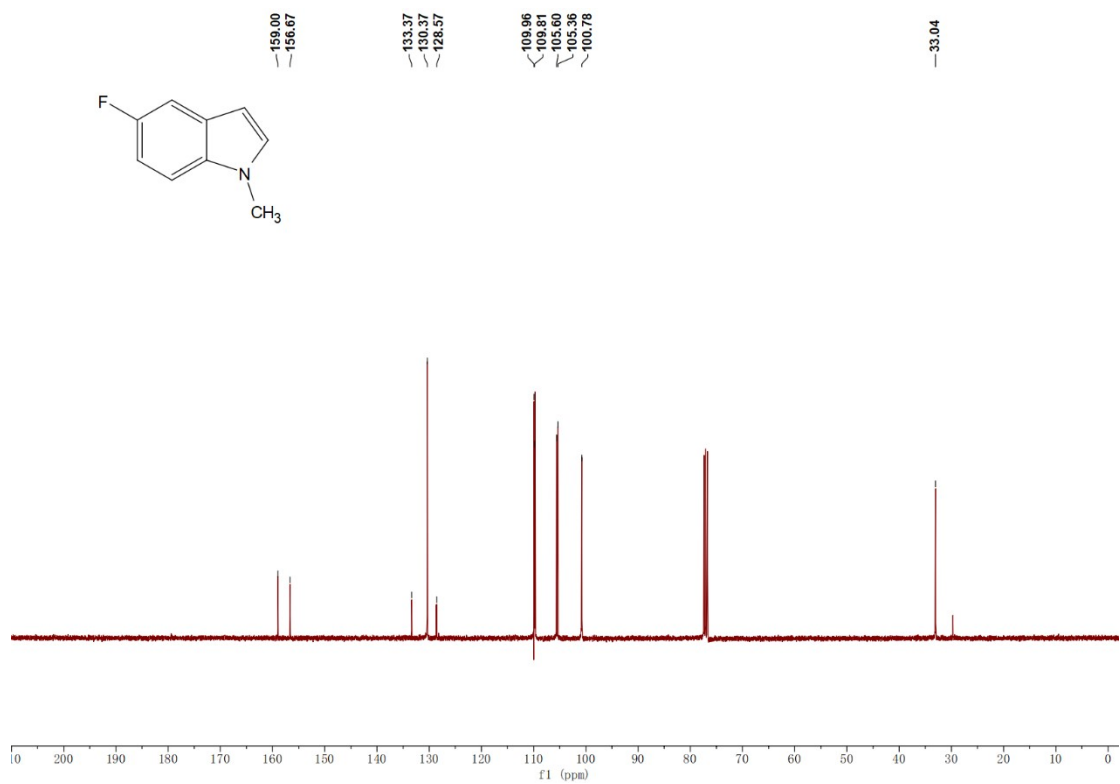

### 6-fluoro-N-methyl-indole

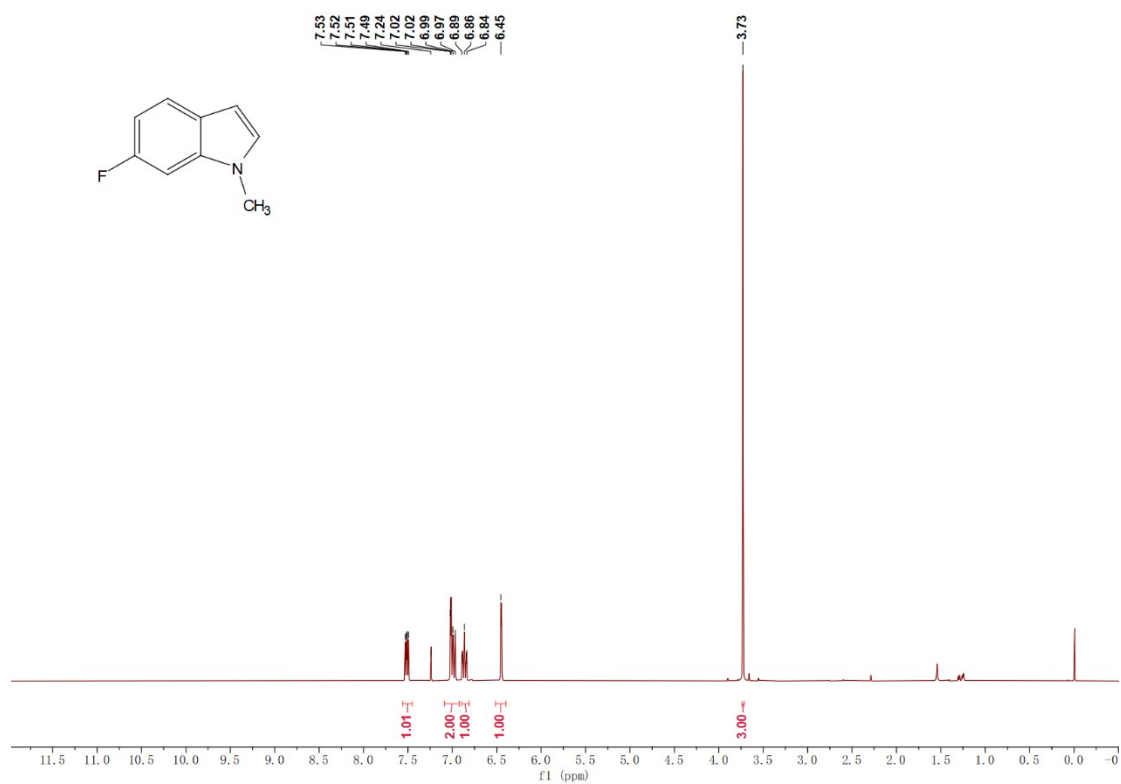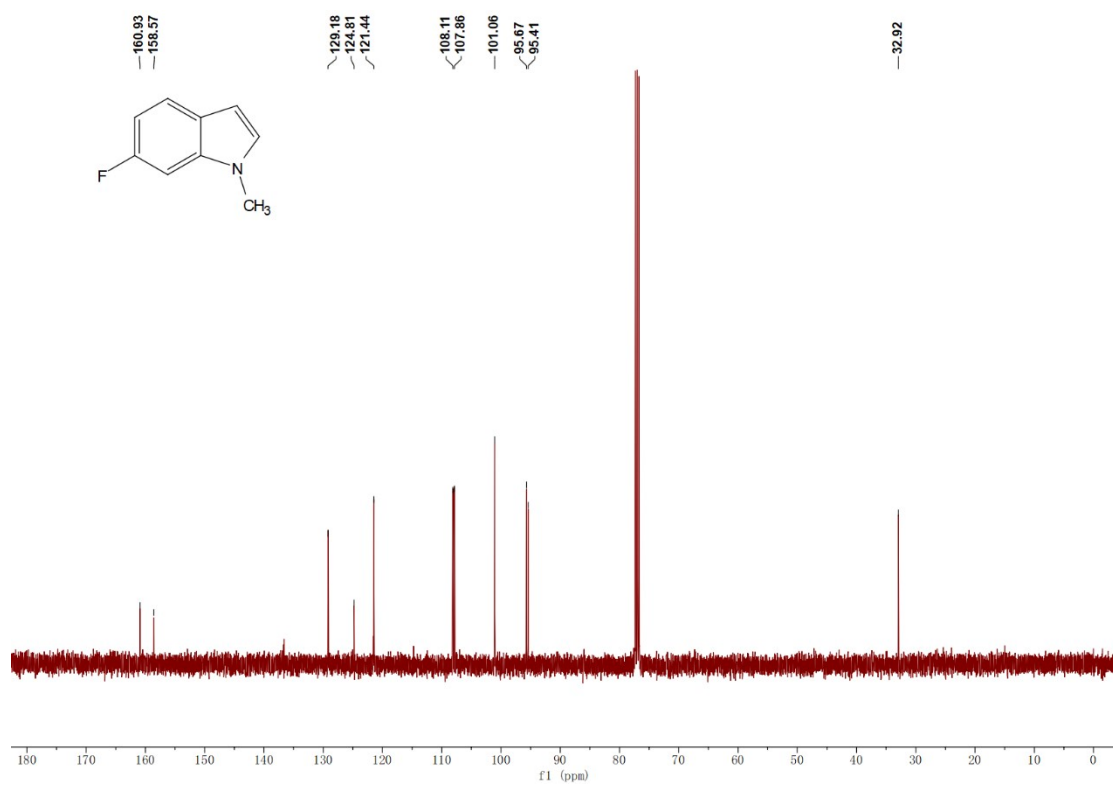

**5-chloro-N-methyl-indole**



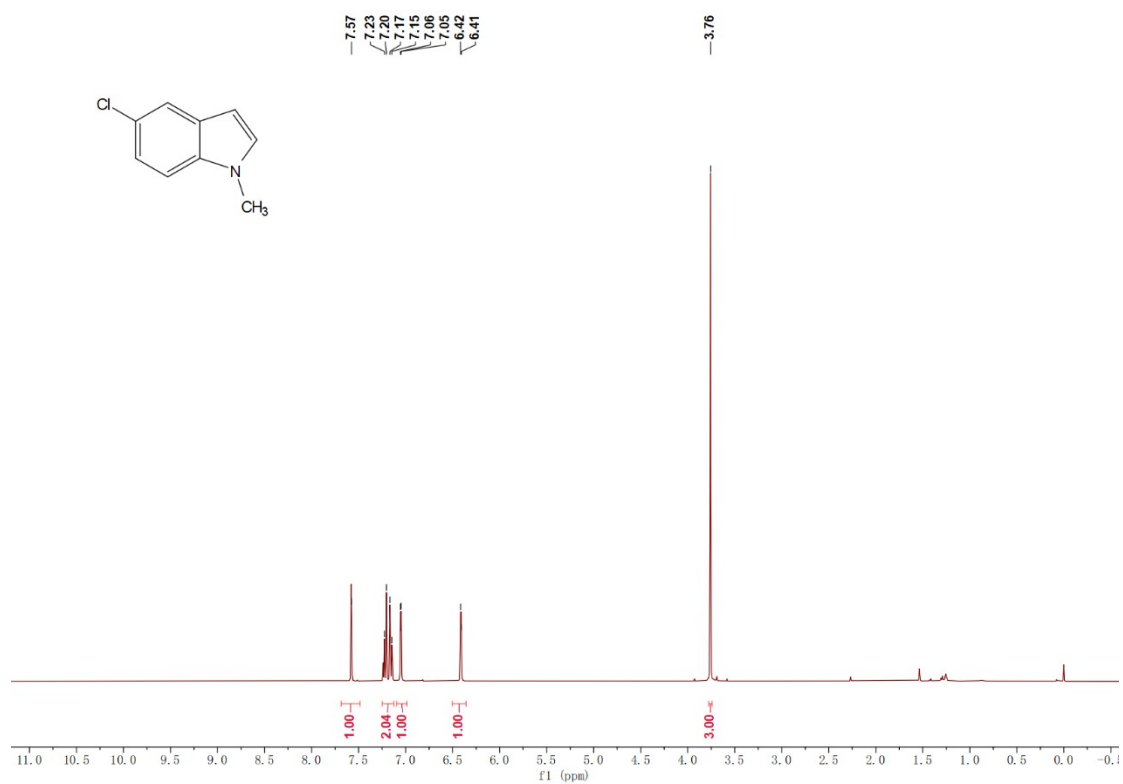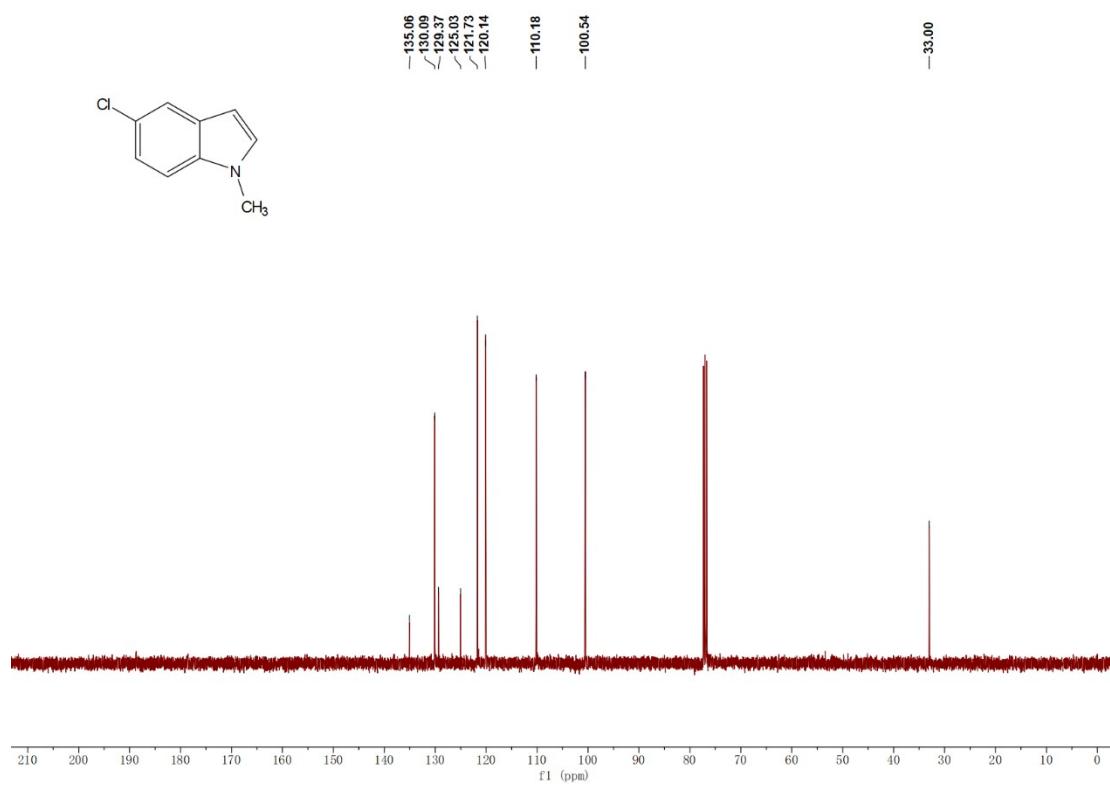

**6-chloro-N-methyl-indole**

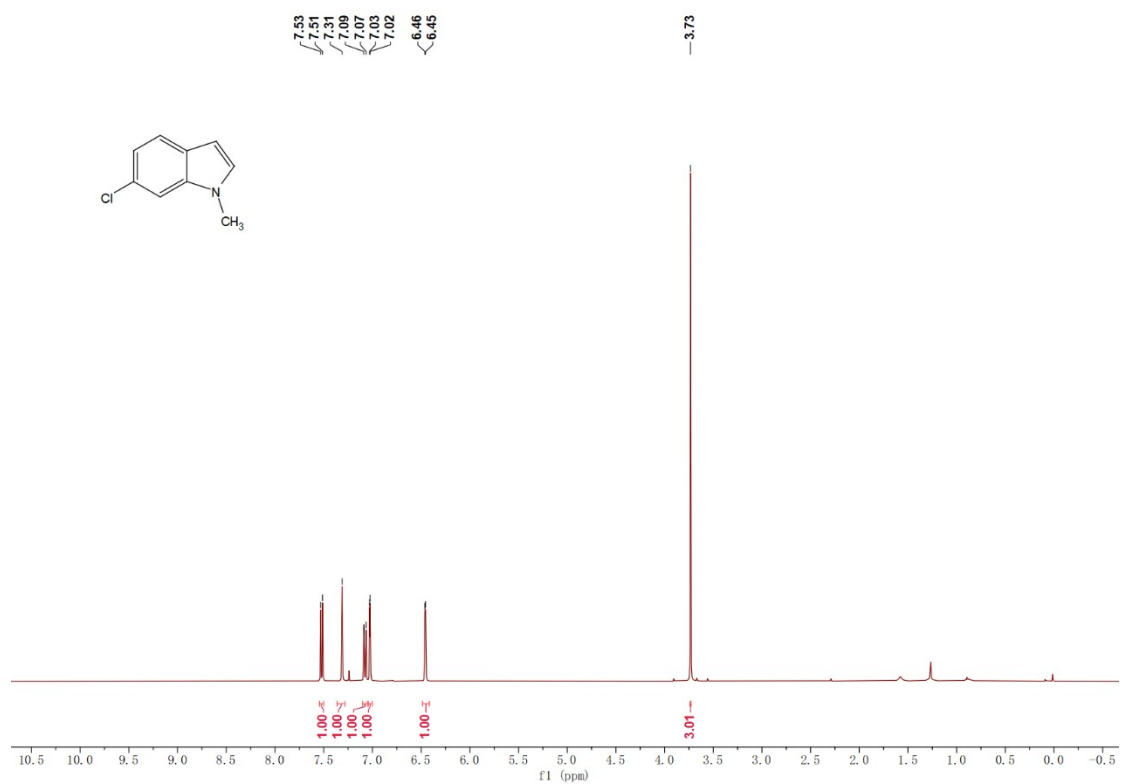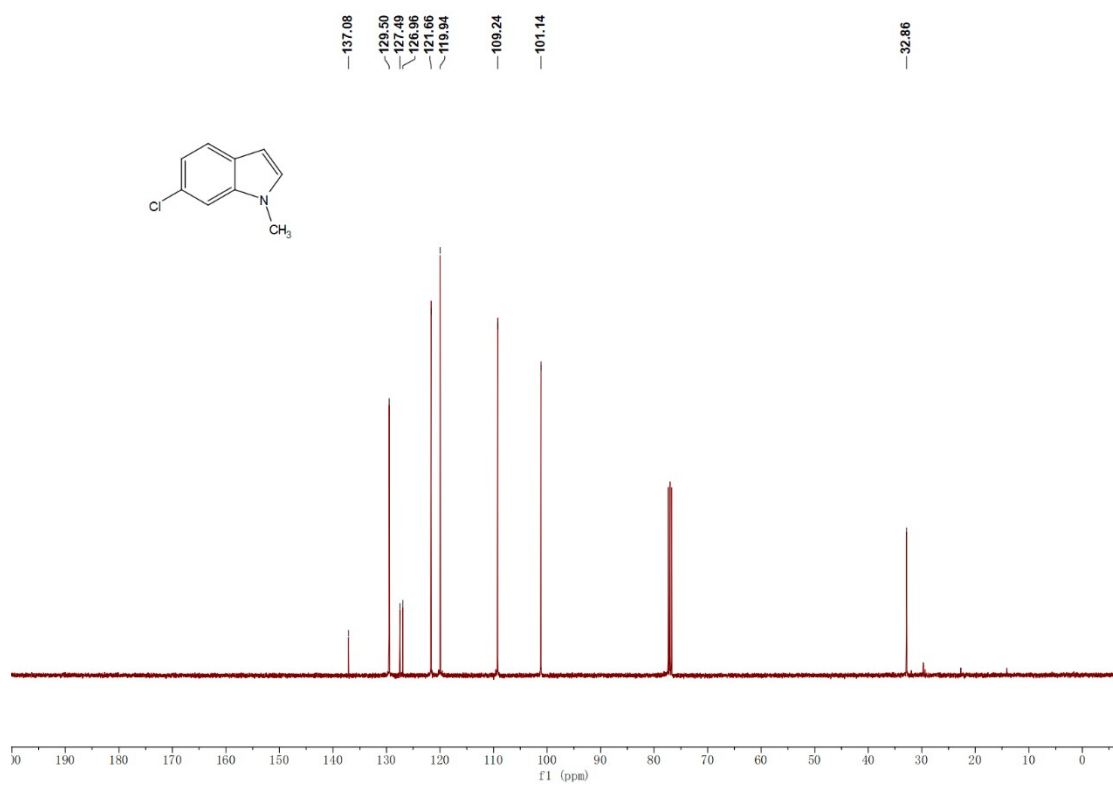

**5- methyl-N-methyl-indole**

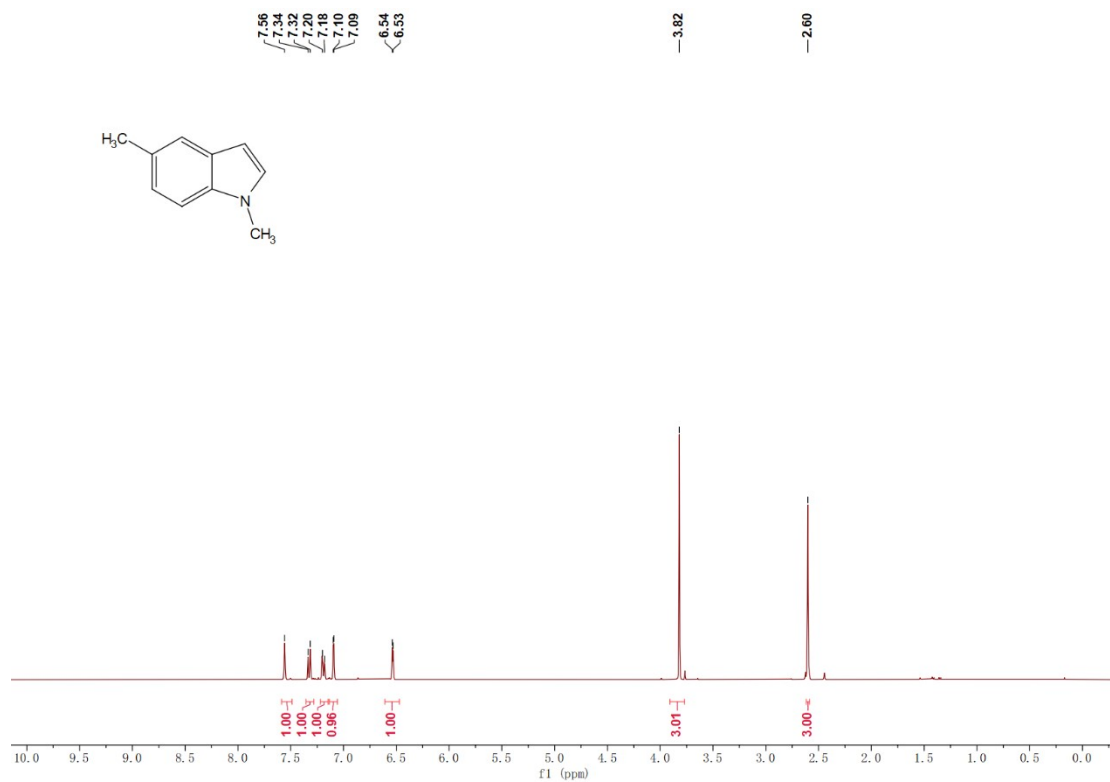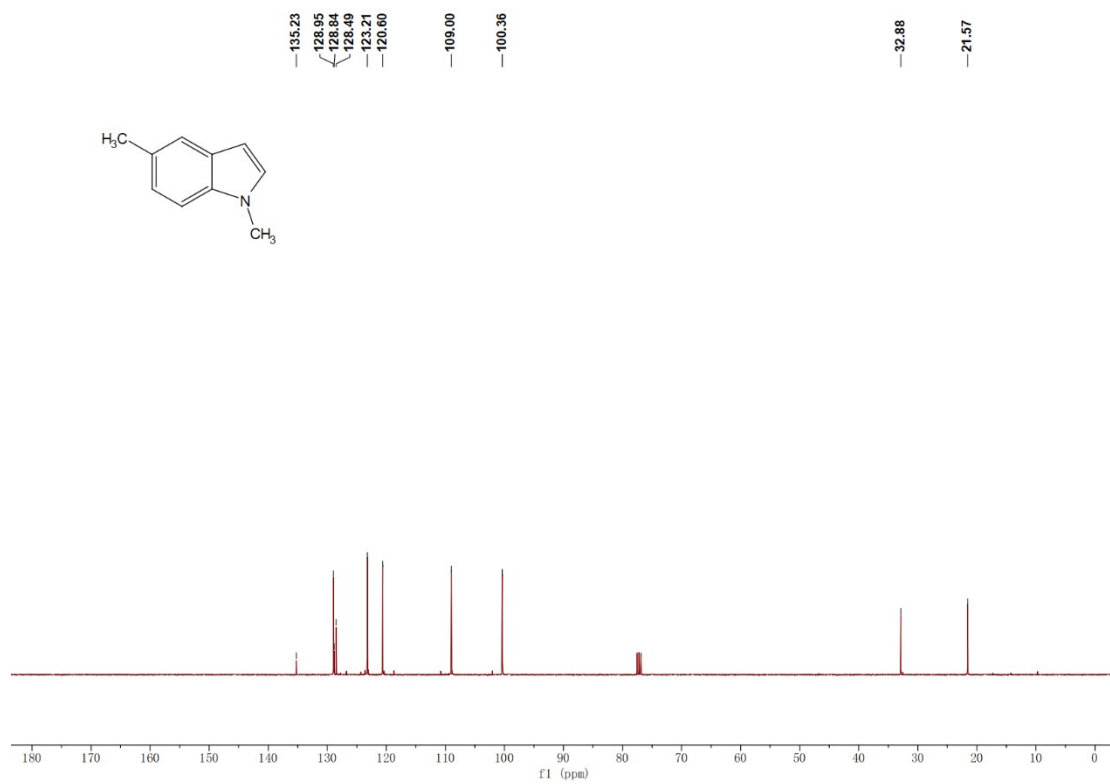

**6- methyl-N-methyl-indole**

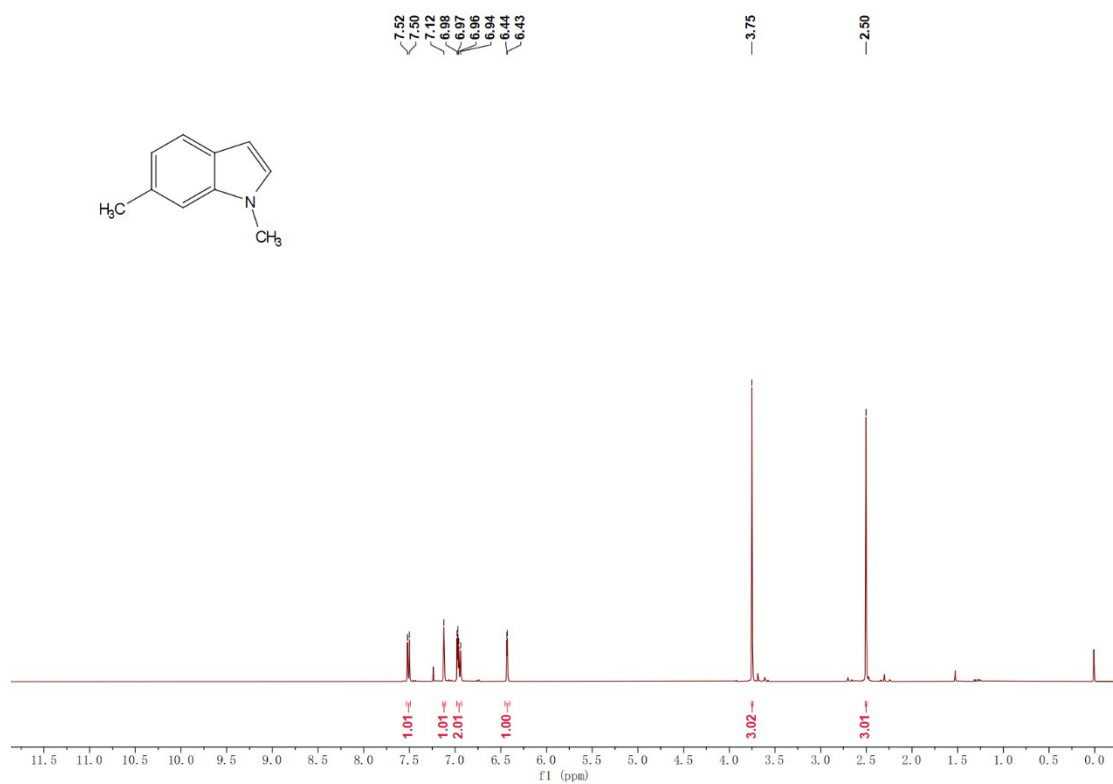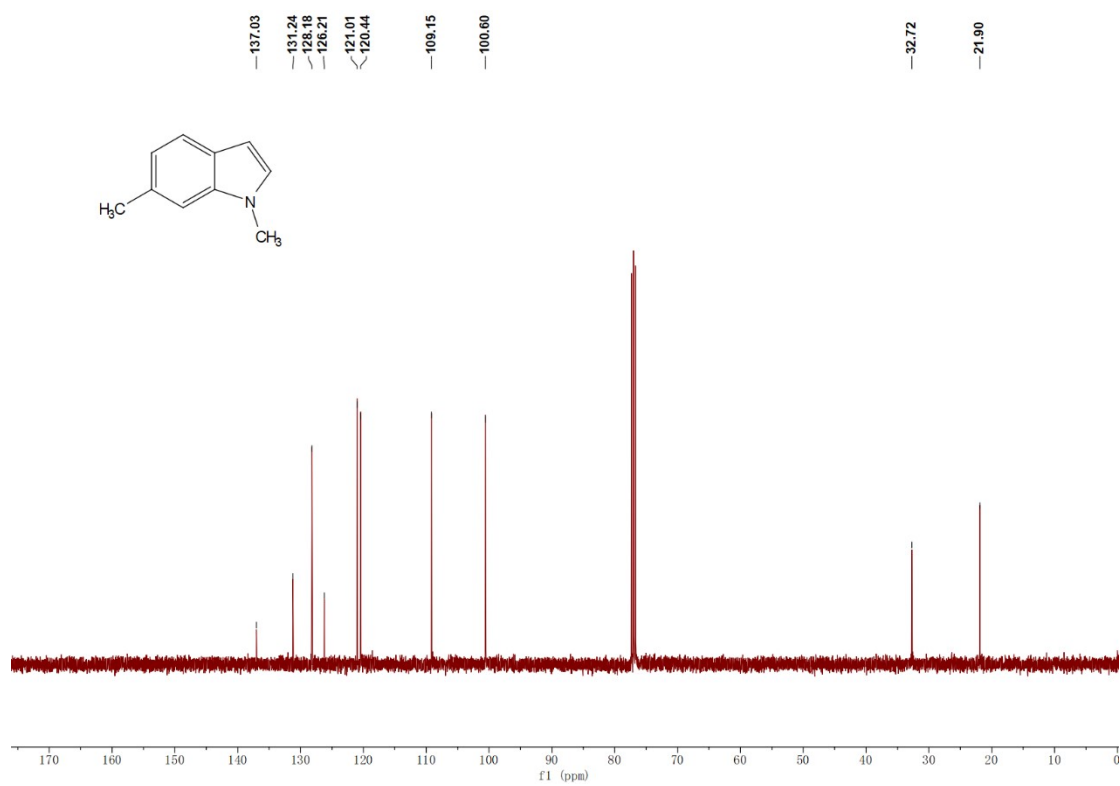

**7- methyl-N-methyl-indole**

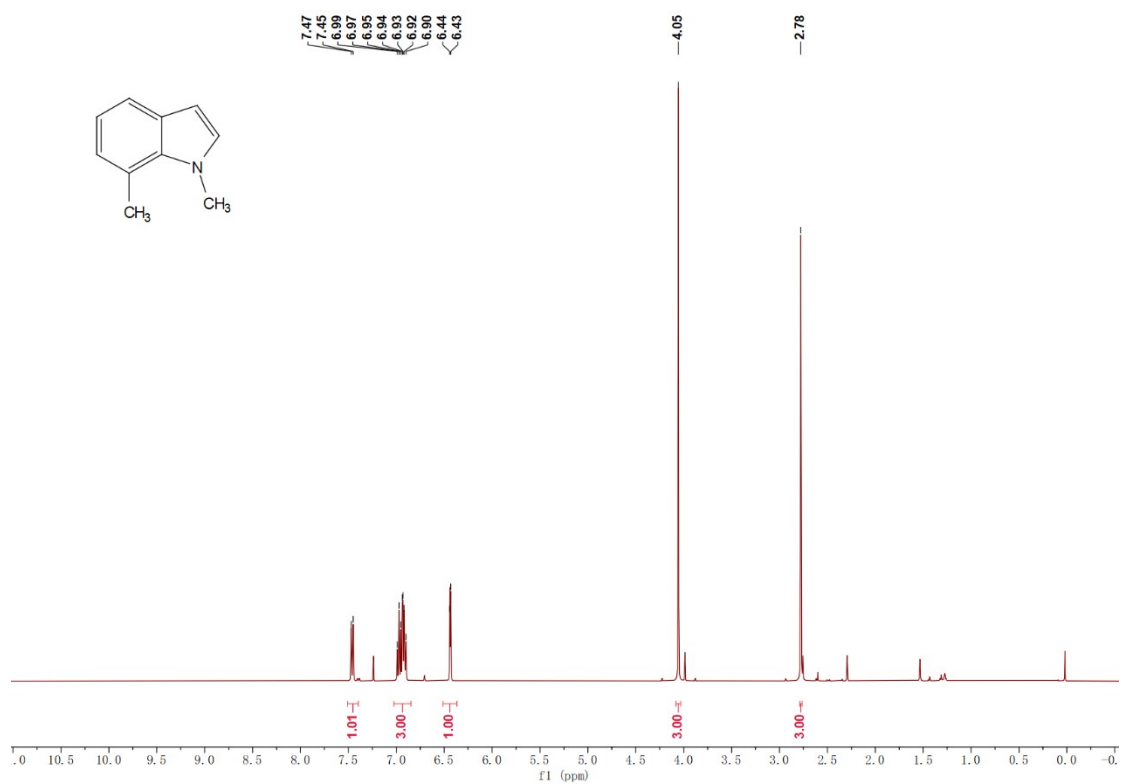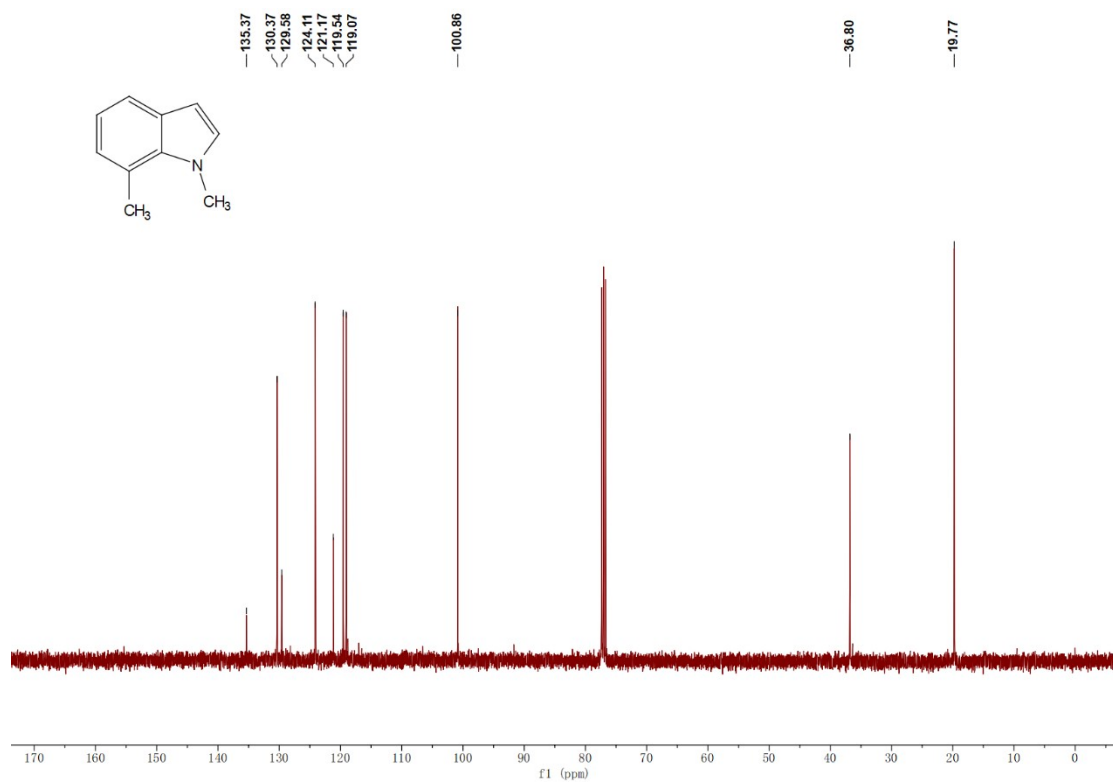

**5-methoxy- N-methyl-indole**

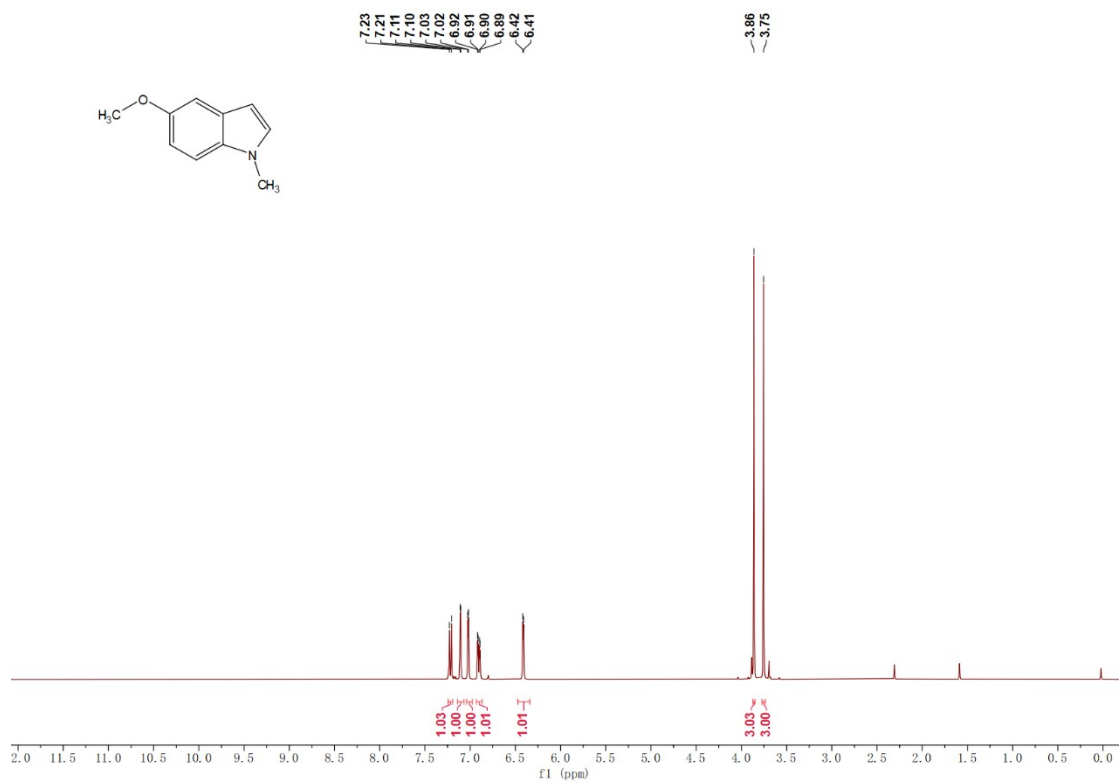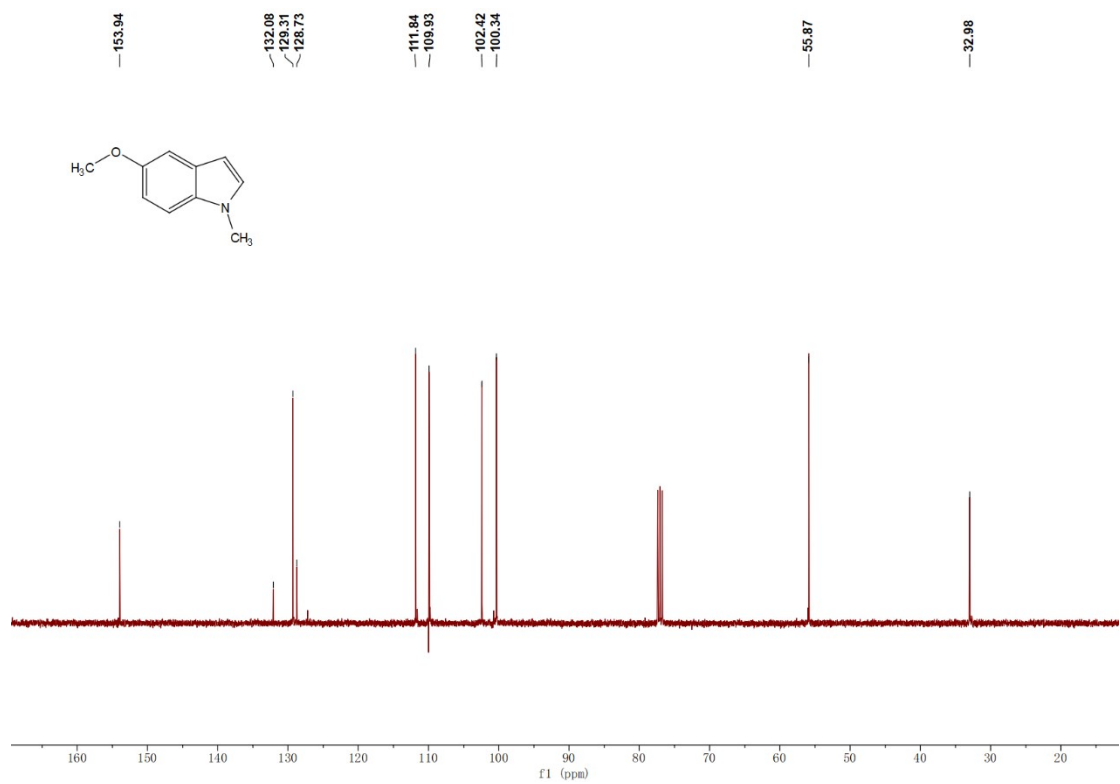

**N-ethyl-indole**

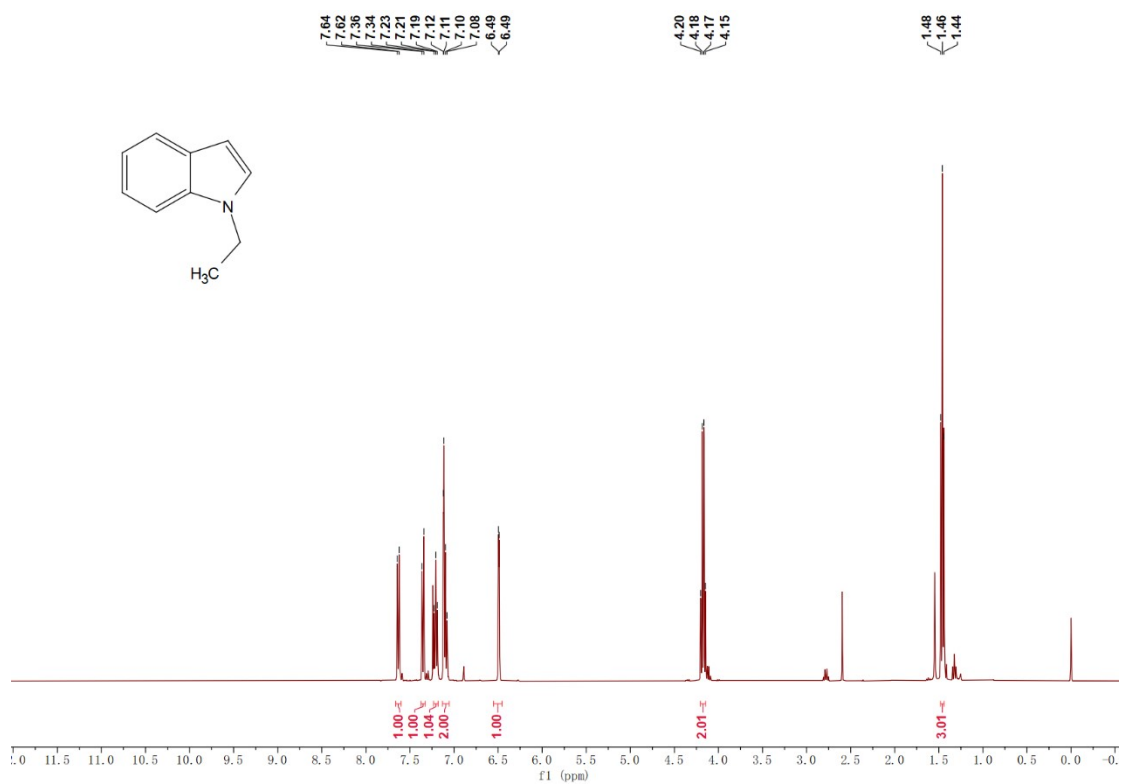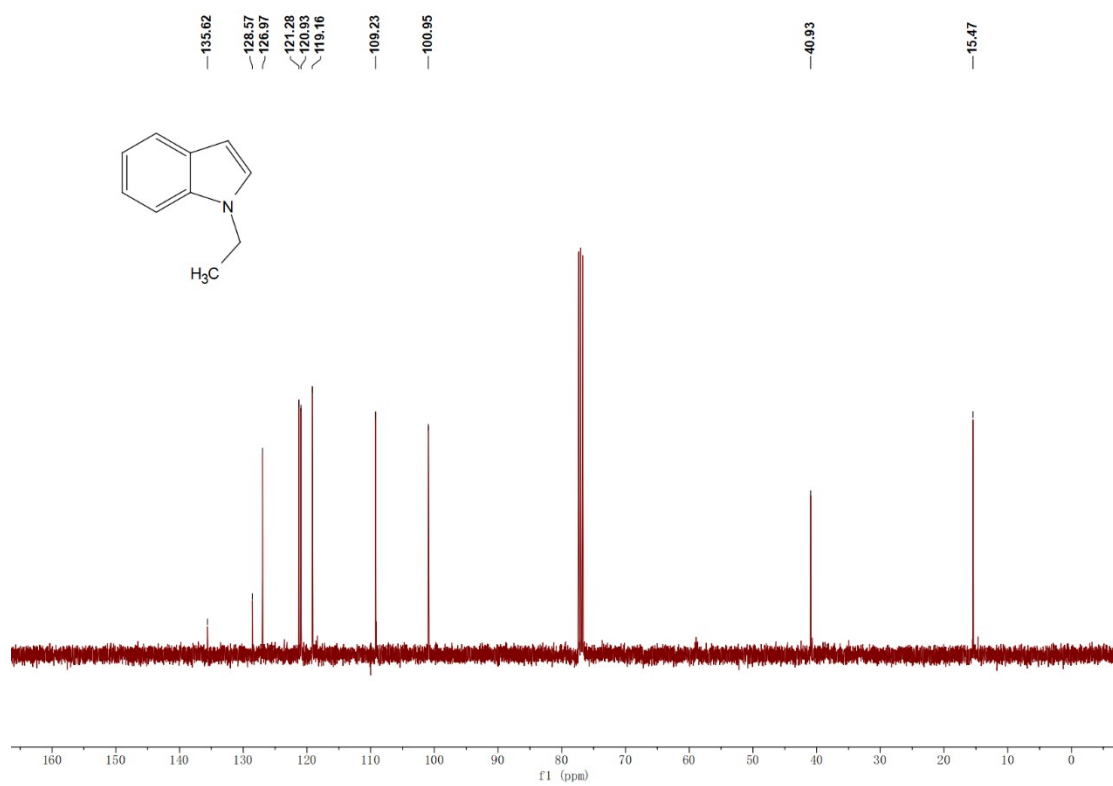

**3-hydroxy-1-methyl-3-(2-oxopropyl)indolin-2-one (3a)**

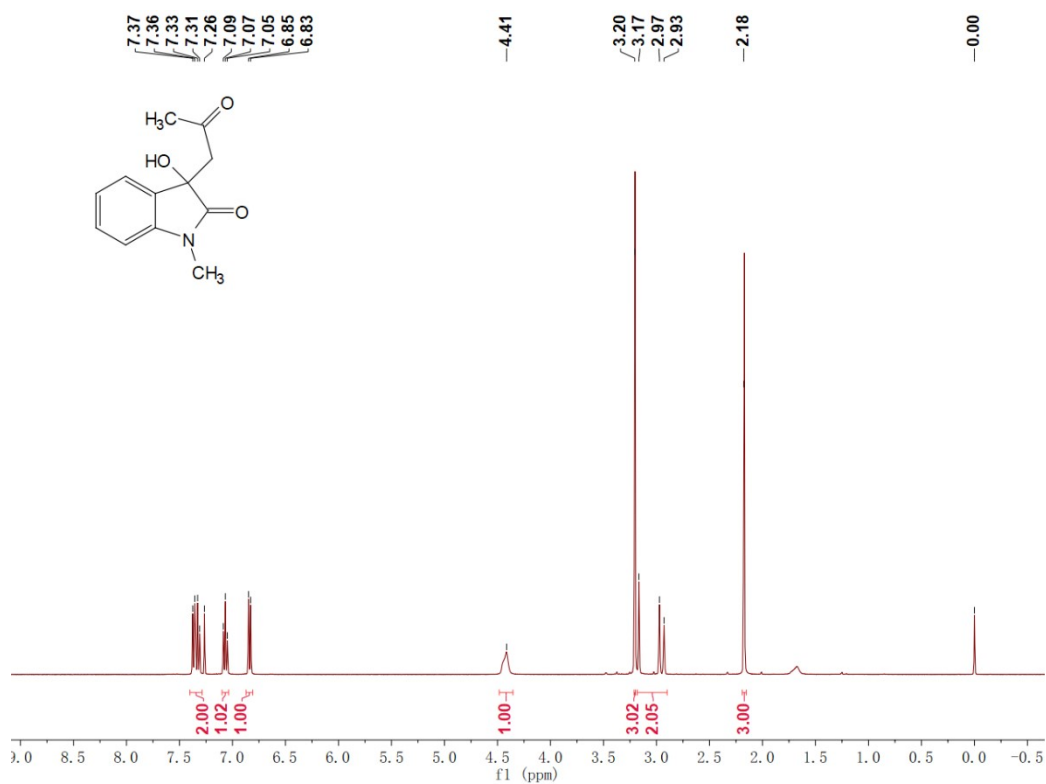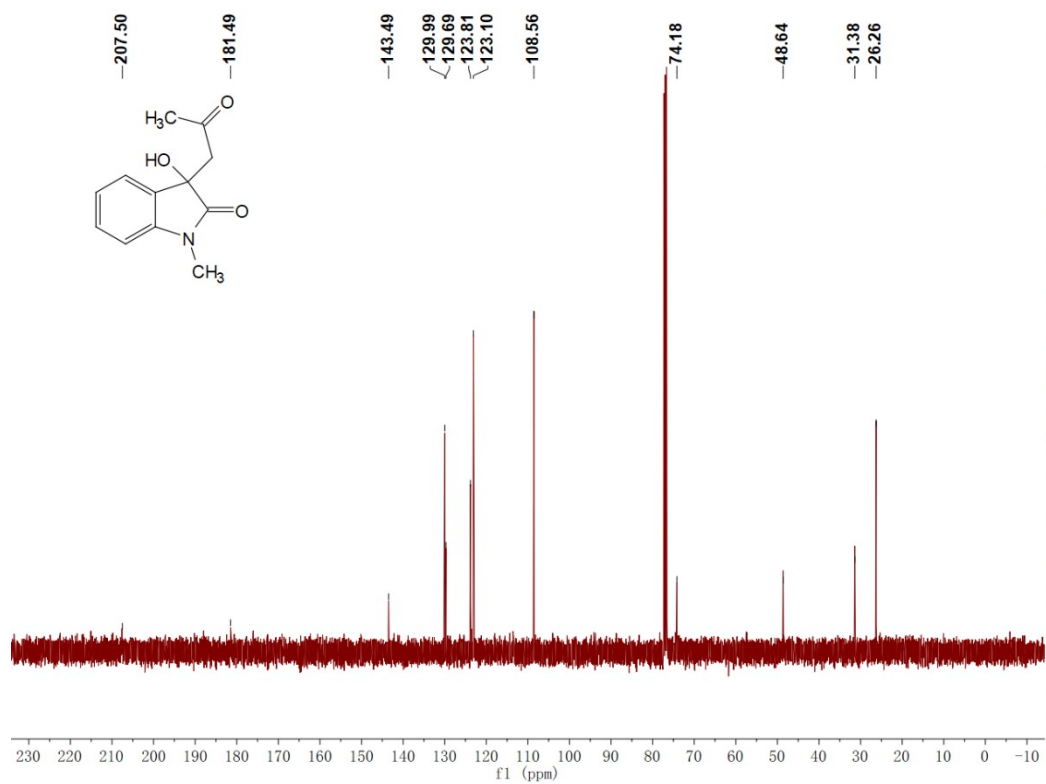

**5-fluoro-3-hydroxy-1-methyl-3-(2-oxopropyl)indolin-2-one (3b)**



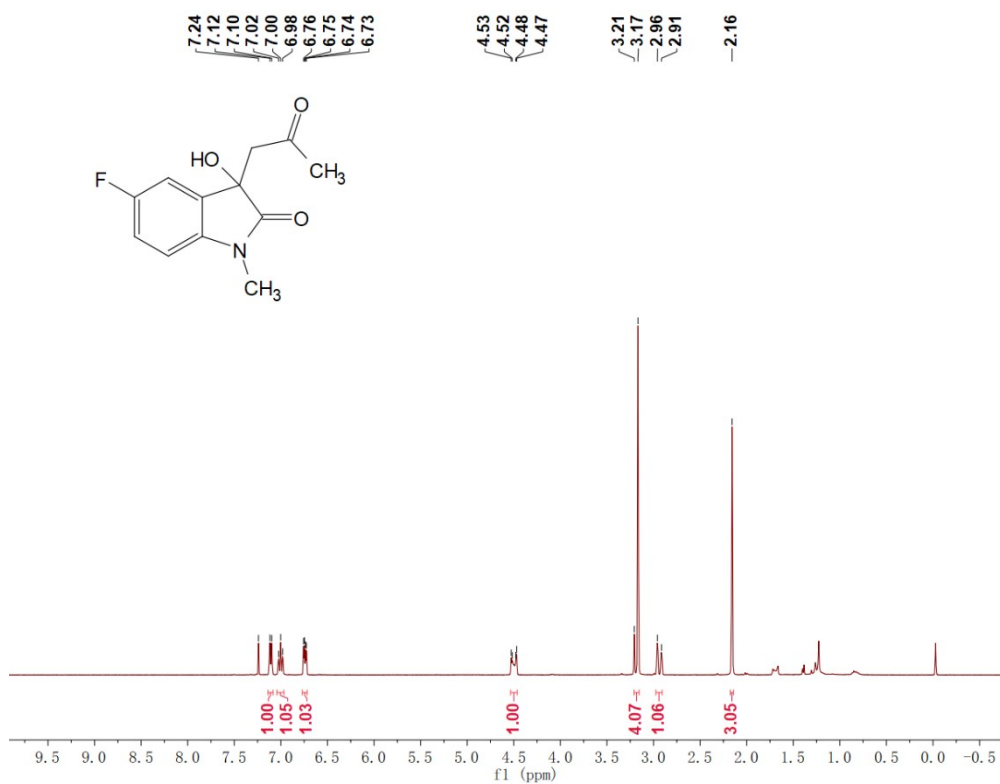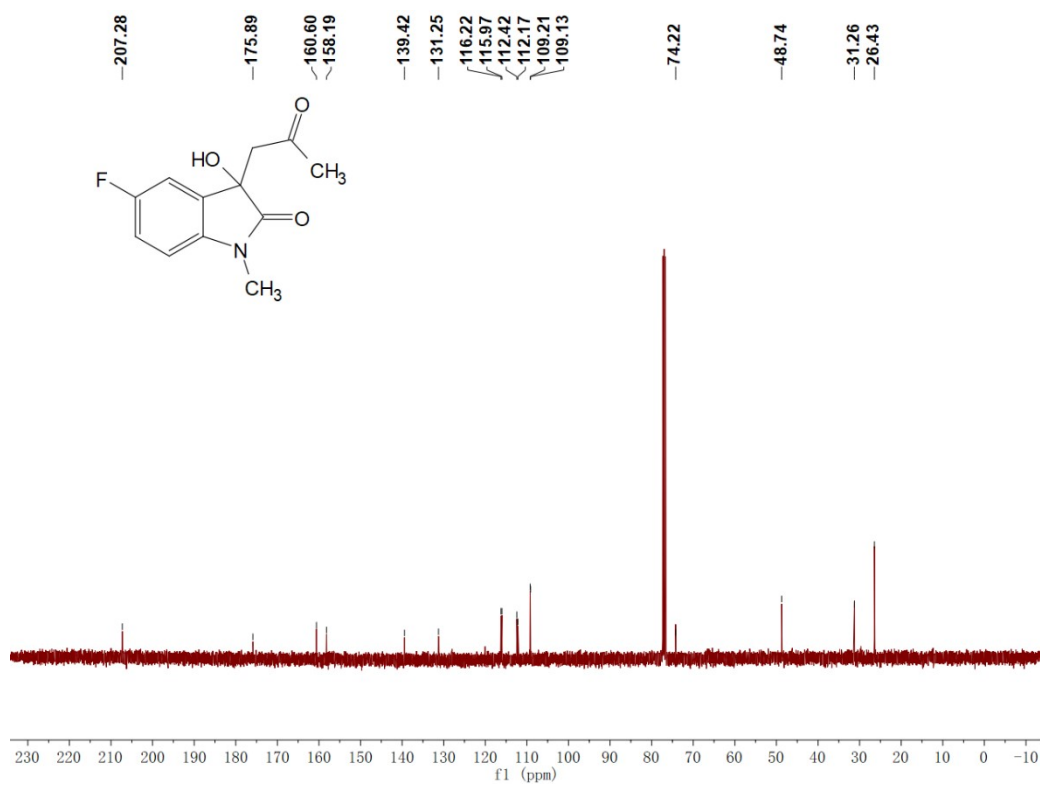

FLUORINE\_01

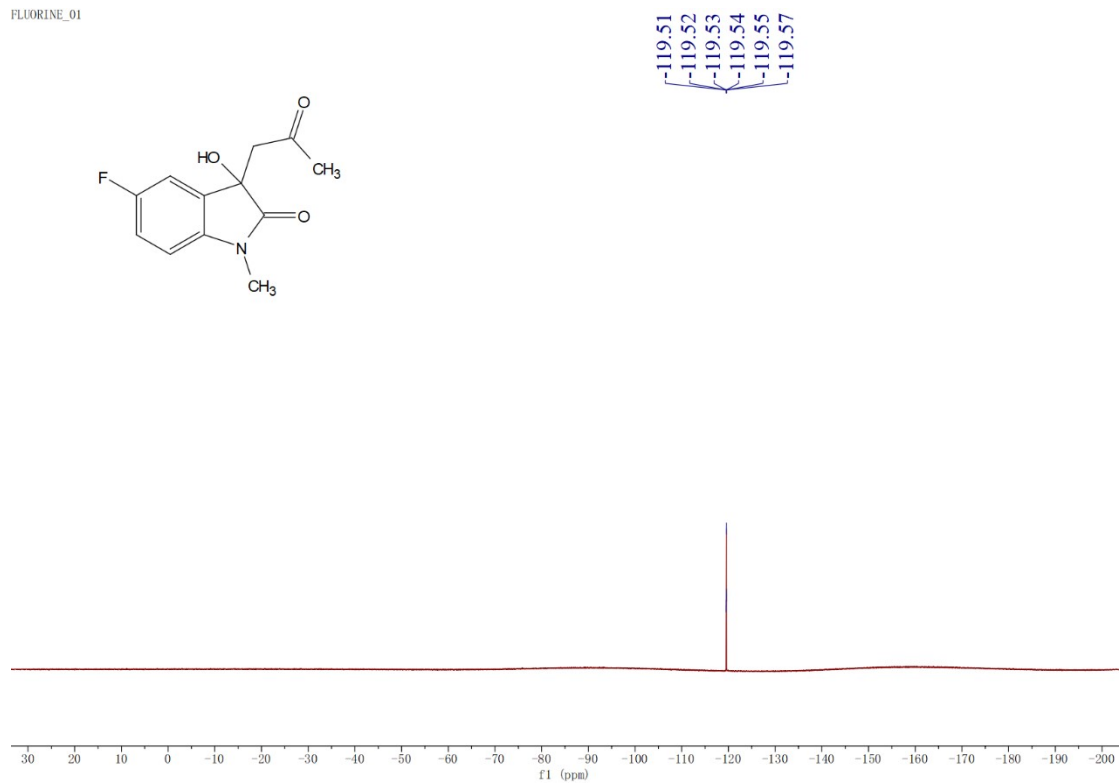

### 6-fluoro-3-hydroxy-1-methyl-3-(2-oxopropyl)indolin-2-one (3c)

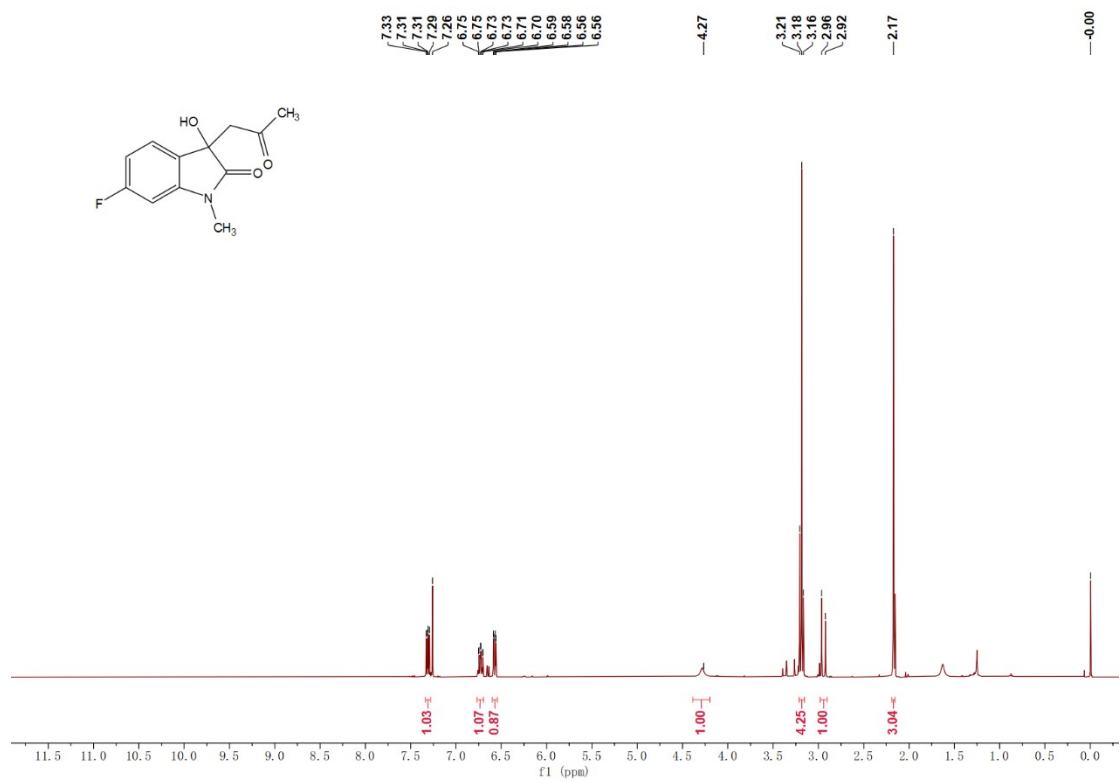

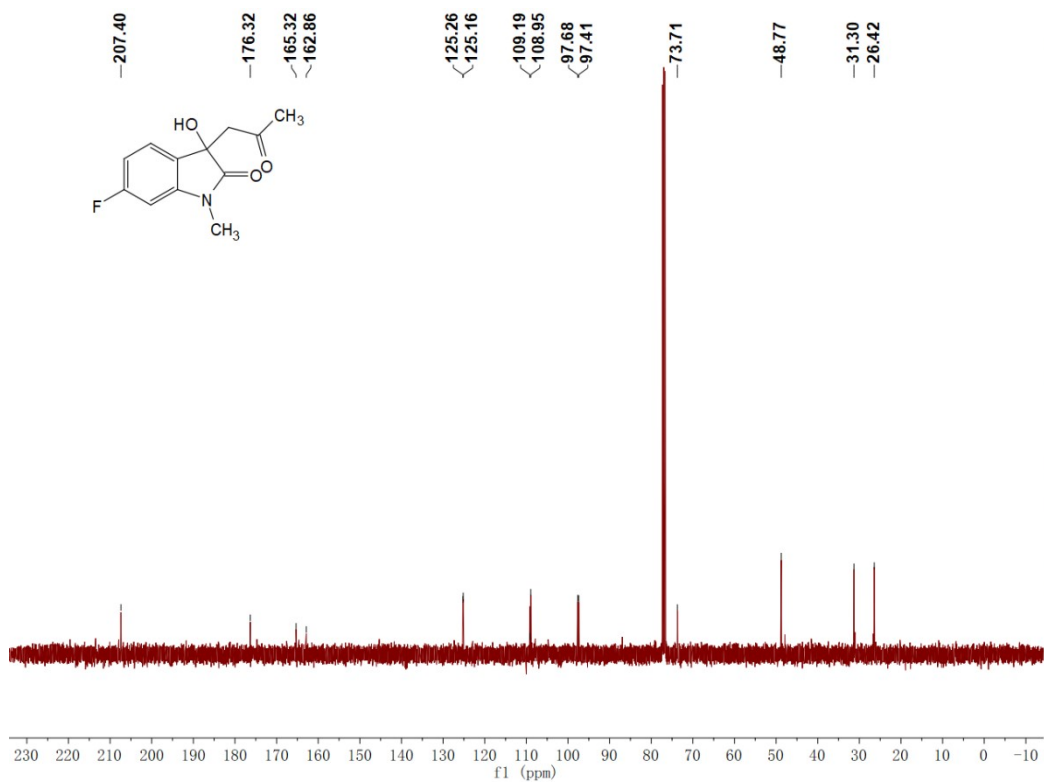

FLUORINE\_01

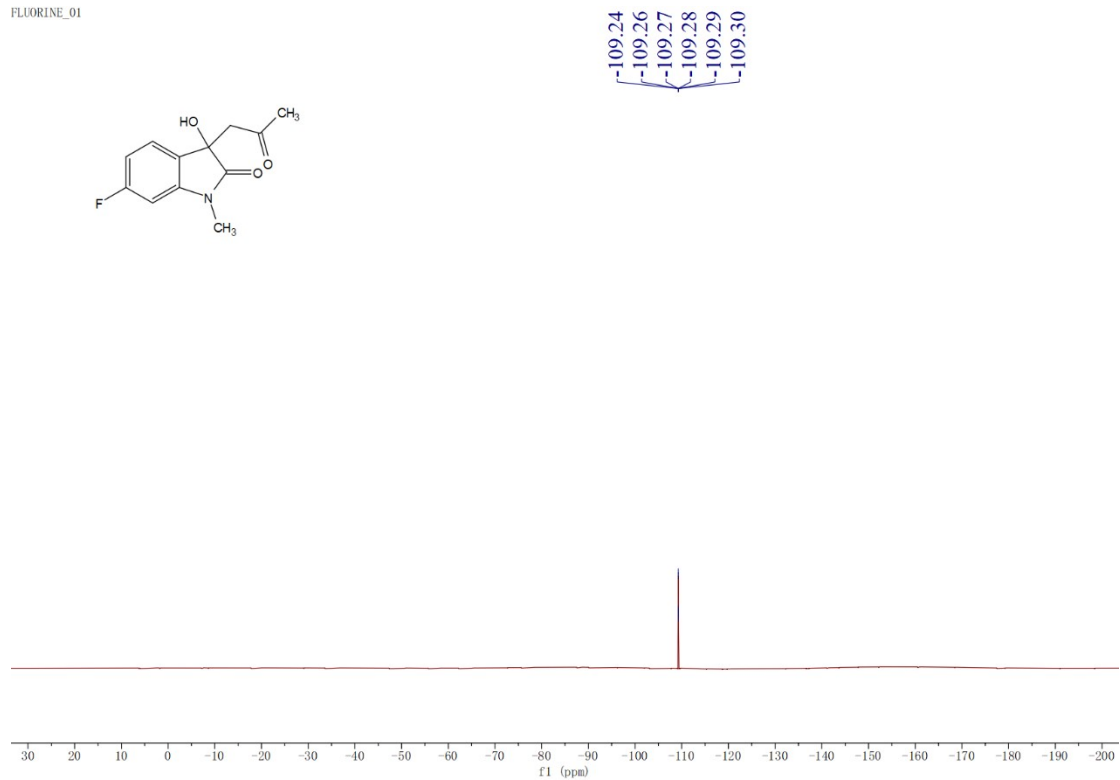

# 7-fluoro-3-hydroxy-1-methyl-3-(2-oxopropyl)indolin-2-one (3d)

PROTON\_01

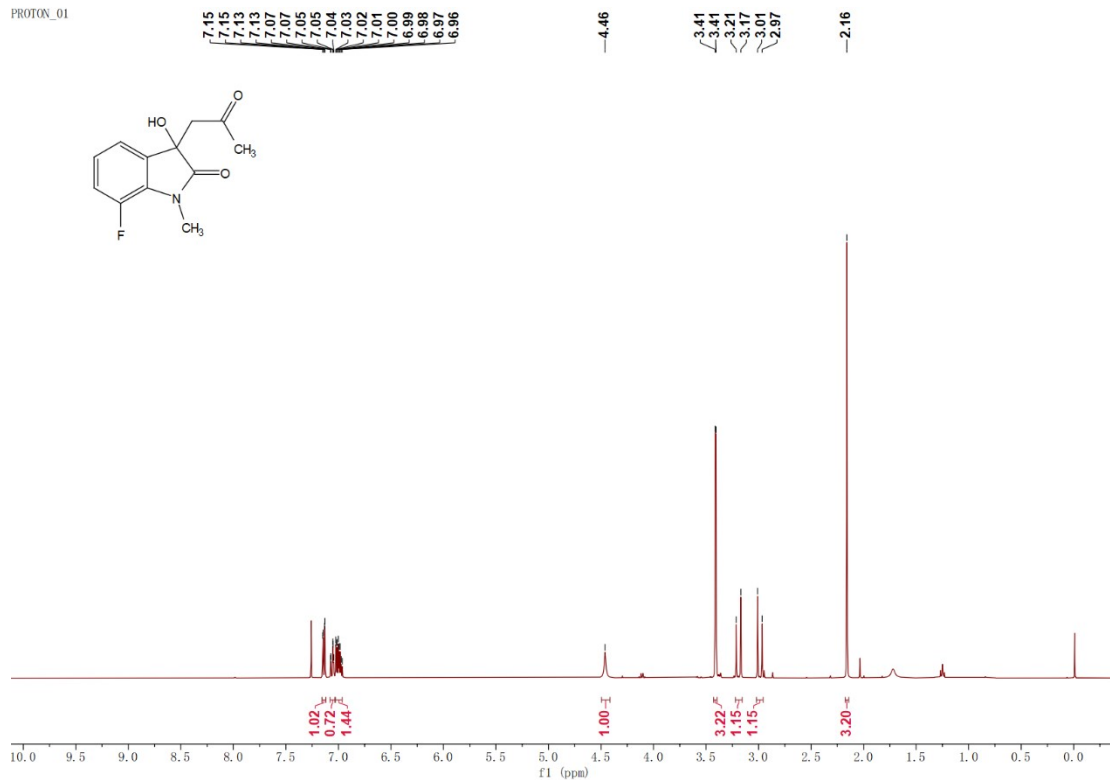

CARBON\_01

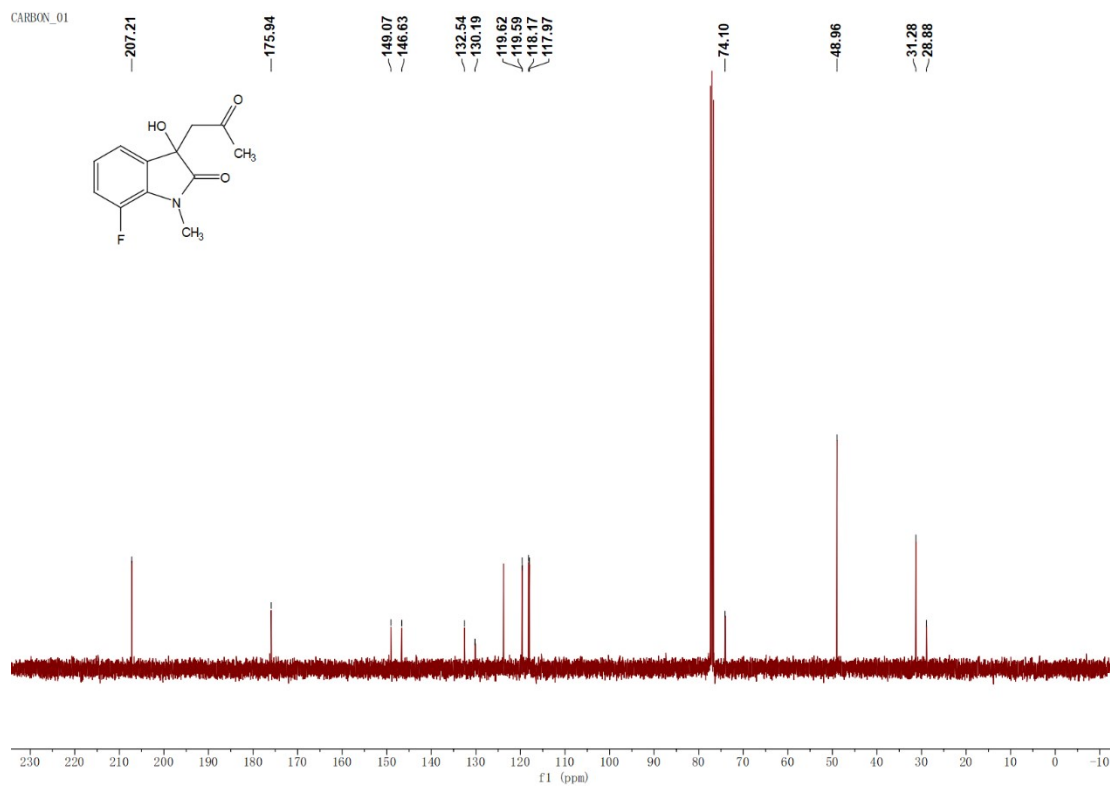

FLUORINE\_01

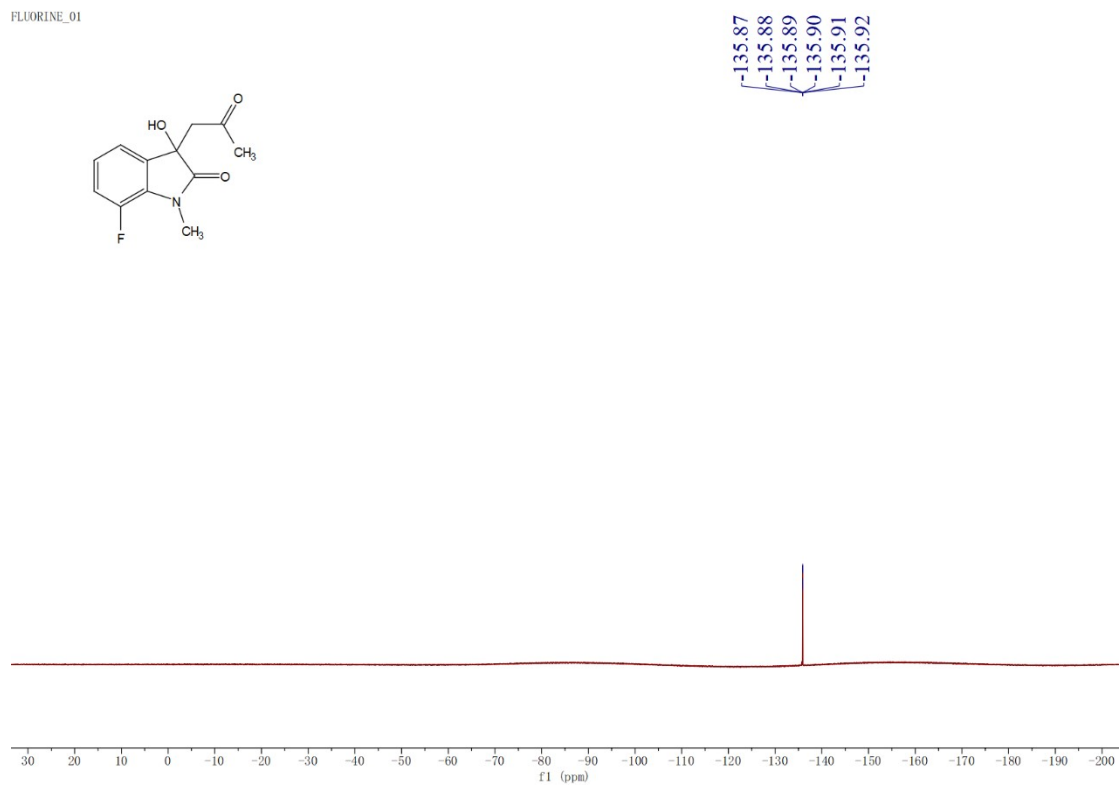

### 4-chloro-3-hydroxy-1-methyl-3-(2-oxopropyl)indolin-2-one (3e)

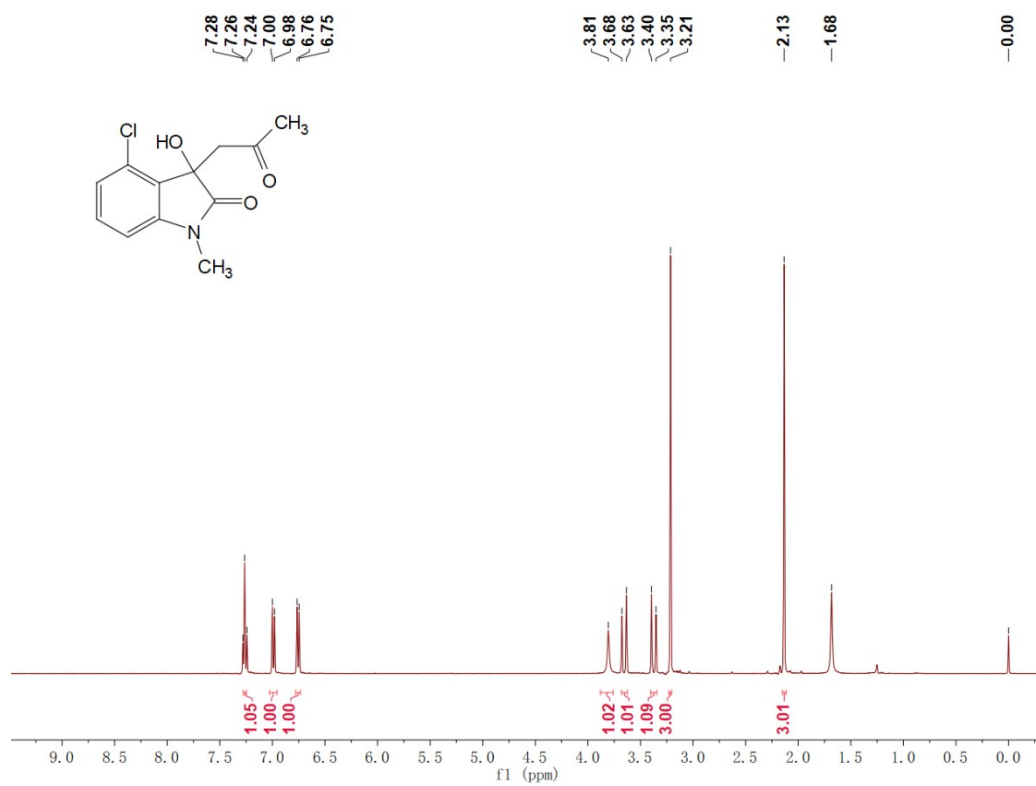

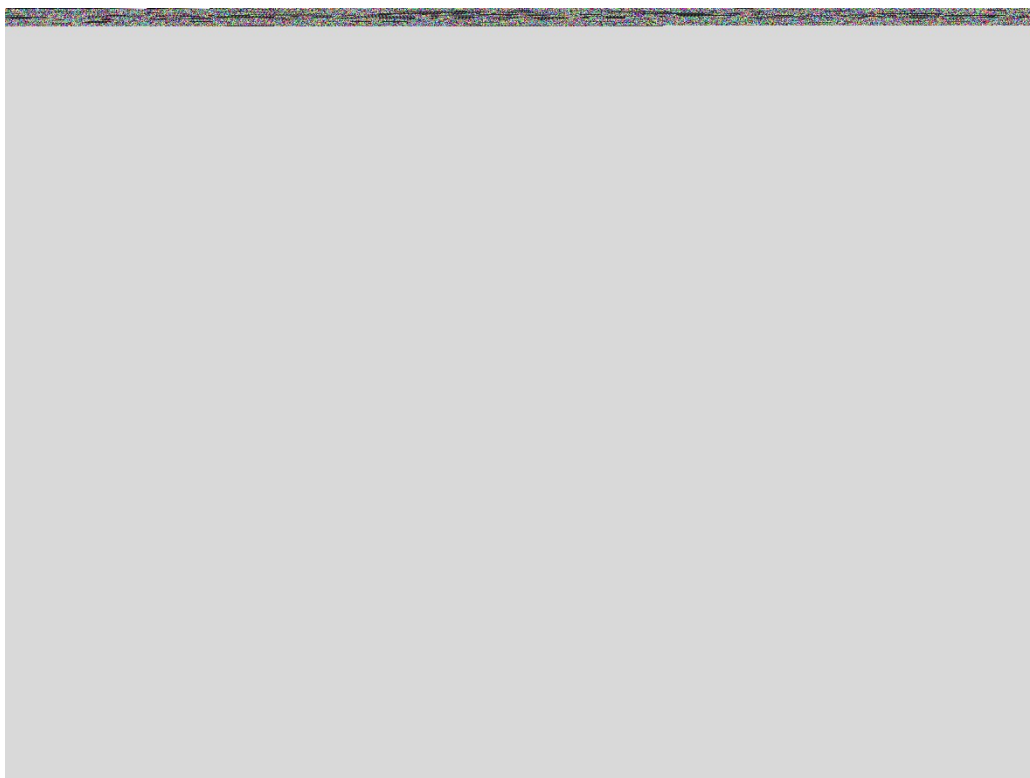

**5-chloro-3-hydroxy-1-methyl-3-(2-oxopropyl)indolin-2-one (3f)**

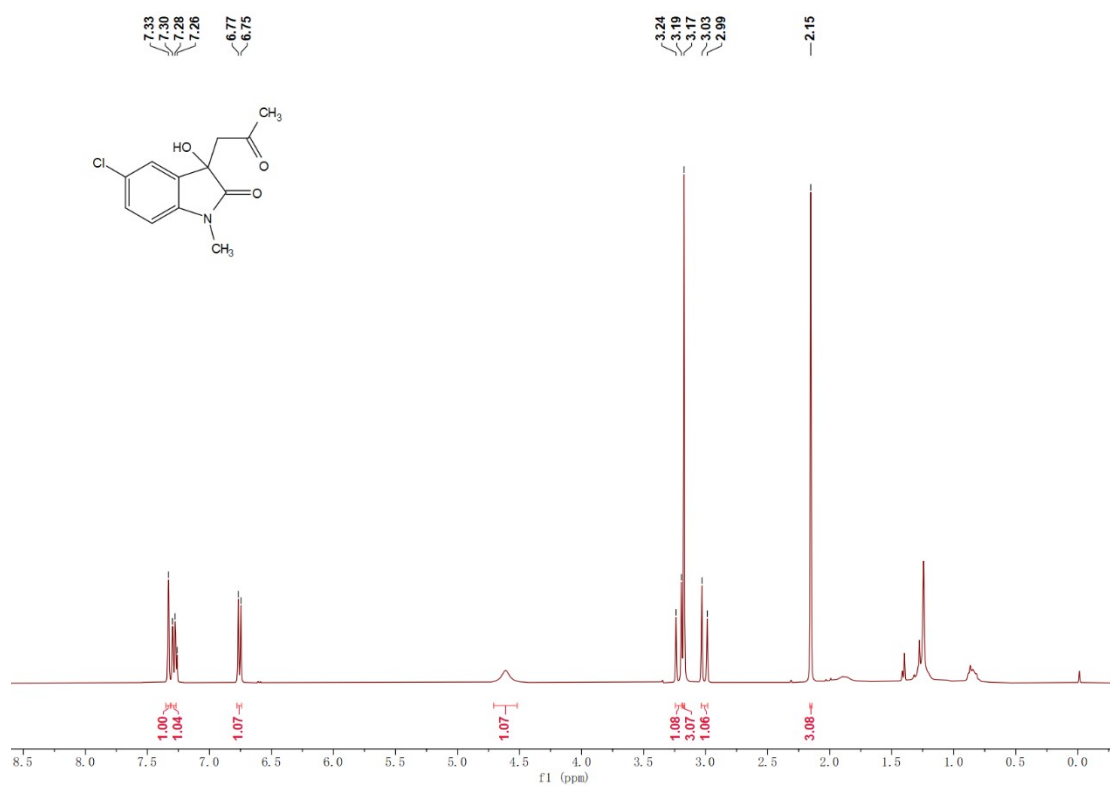

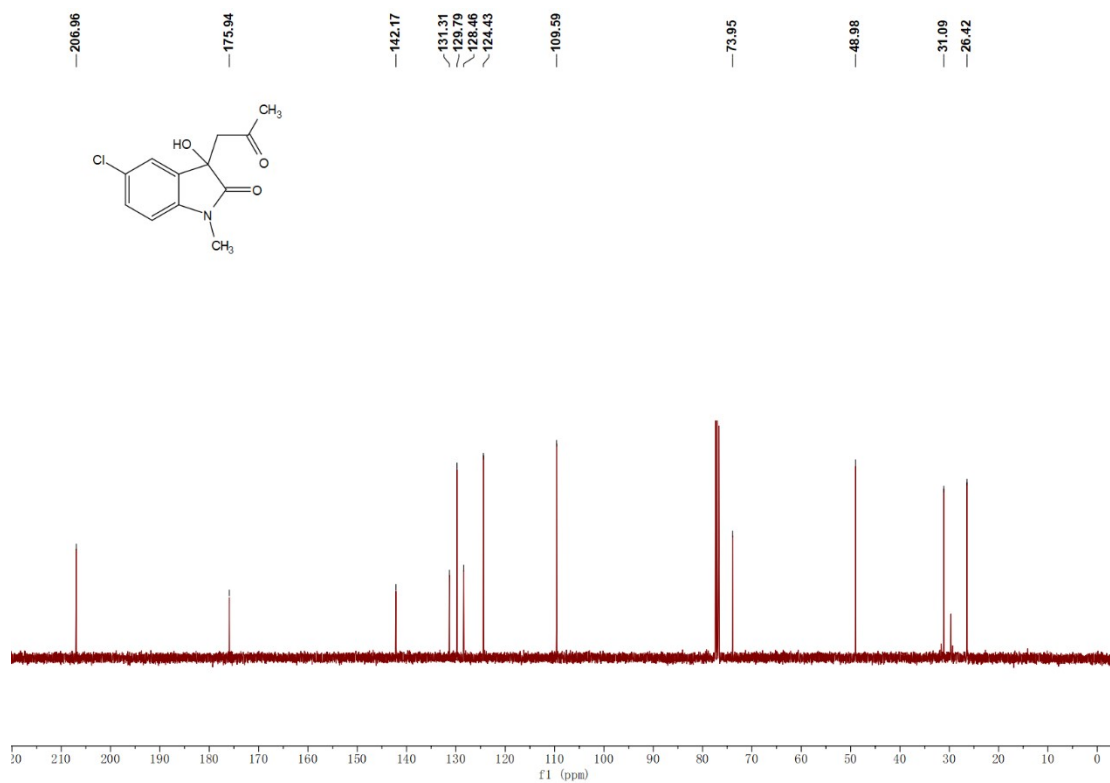

### 6-chloro-3-hydroxy-1-methyl-3-(2-oxopropyl)indolin-2-one (3g)

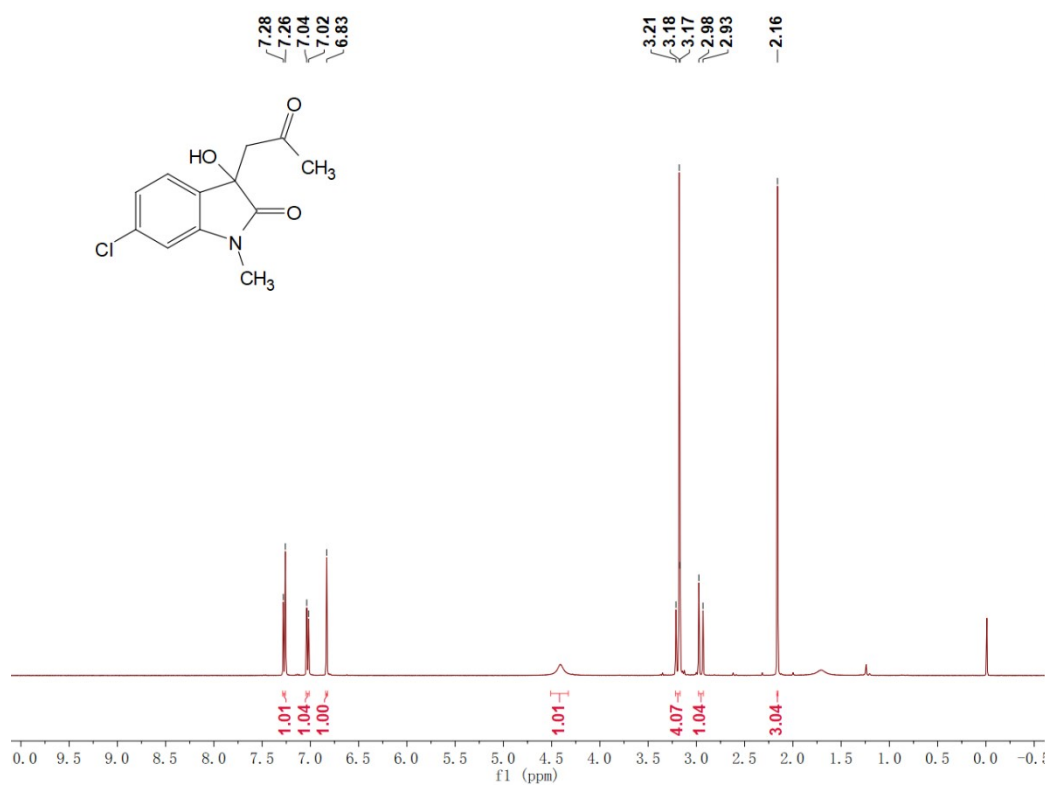

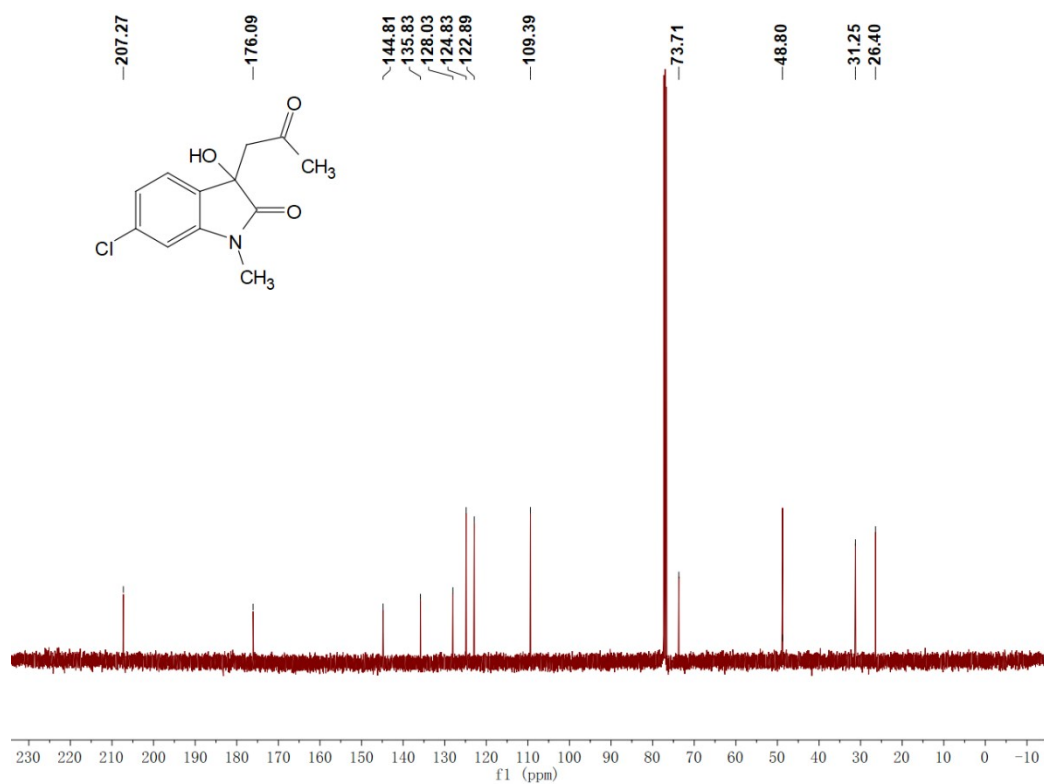

### 7-chloro-3-hydroxy-1-methyl-3-(2-oxopropyl)indolin-2-one (3h)

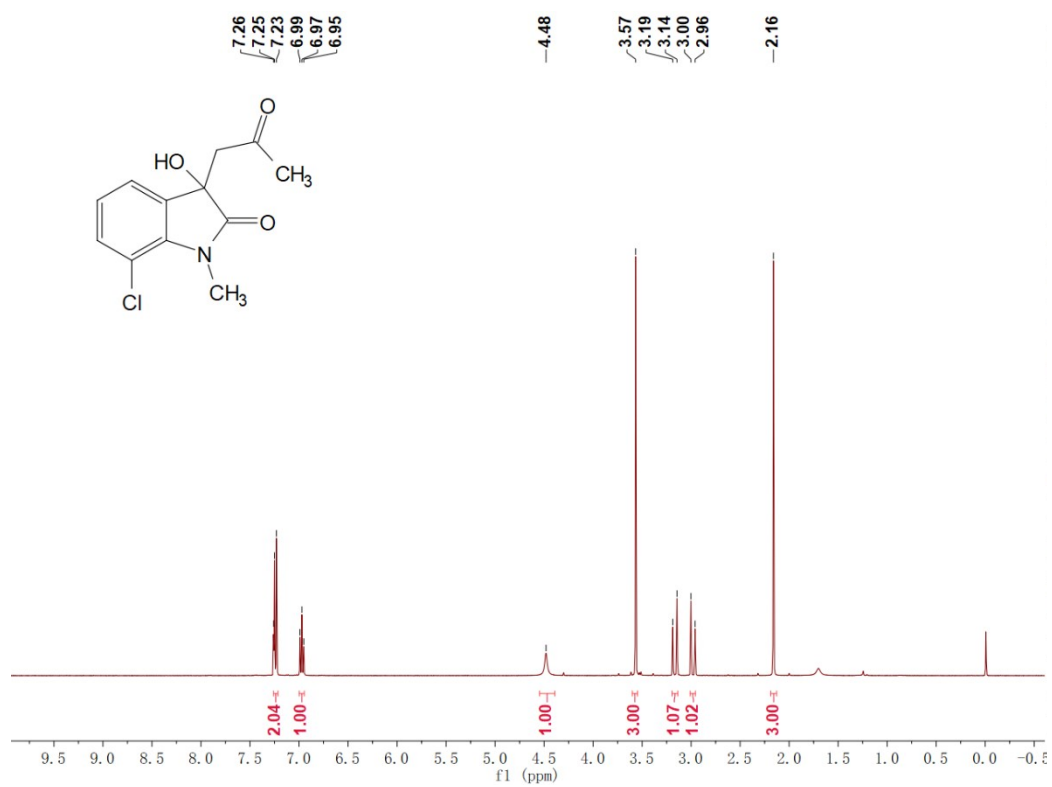



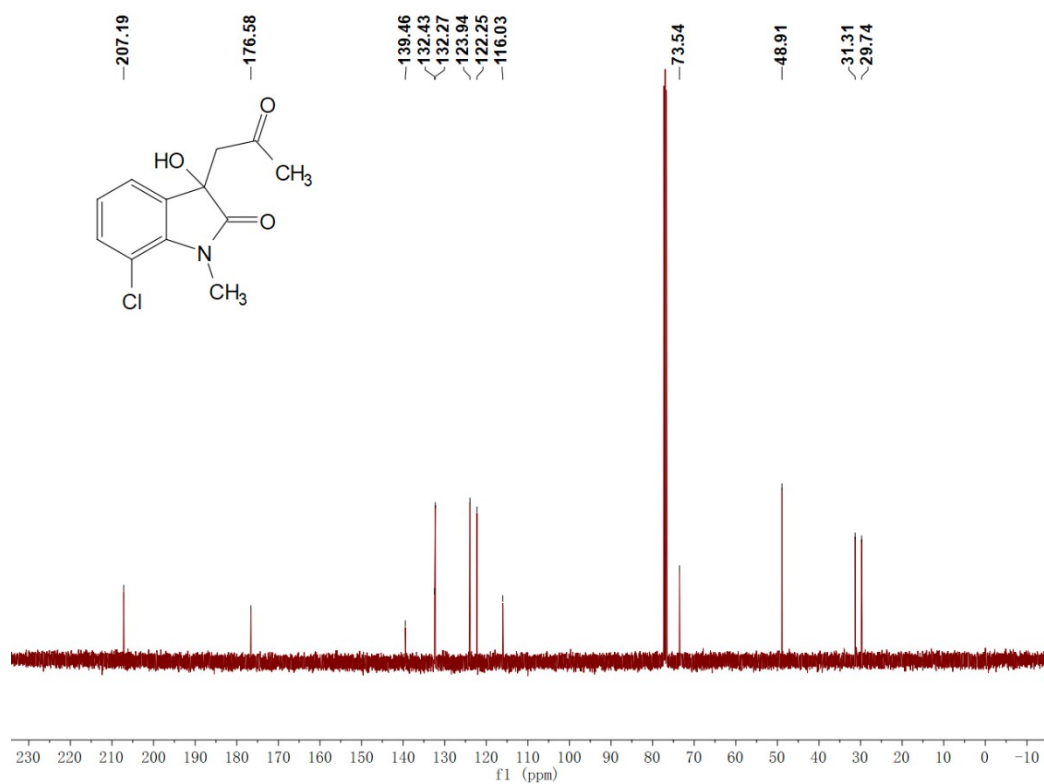

### 4-bromo-3-hydroxy-1-methyl-3-(2-oxopropyl)indolin-2-one (3i)

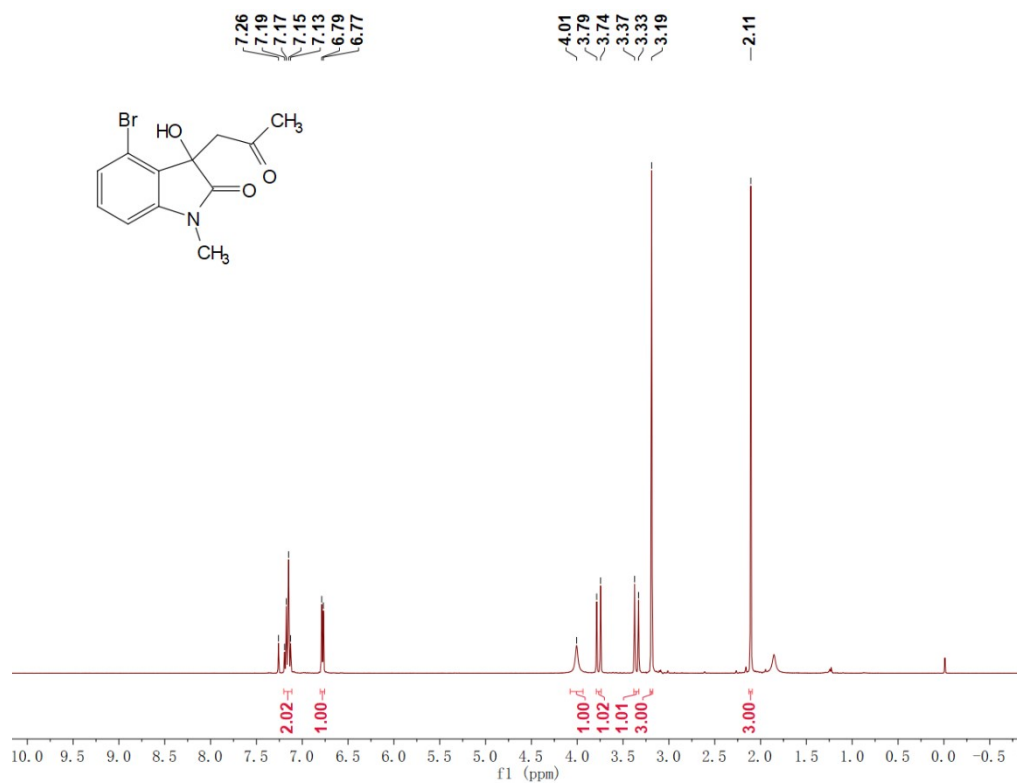

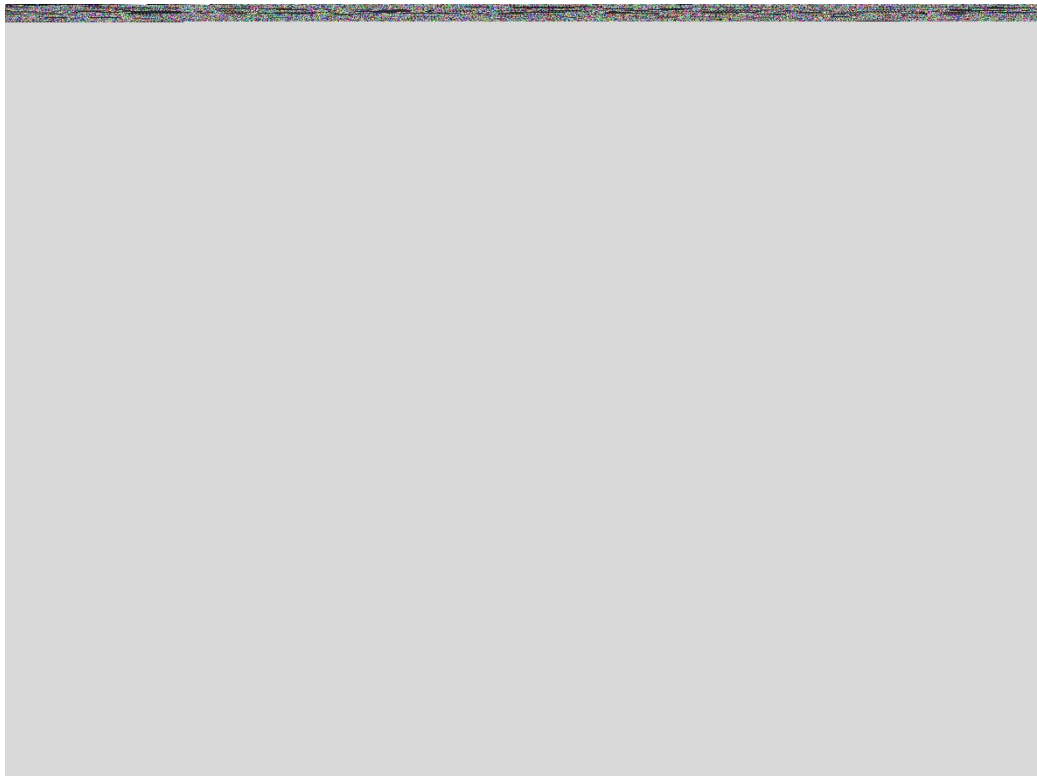

**5-bromo-3-hydroxy-1-methyl-3-(2-oxopropyl)indolin-2-one (3j)**

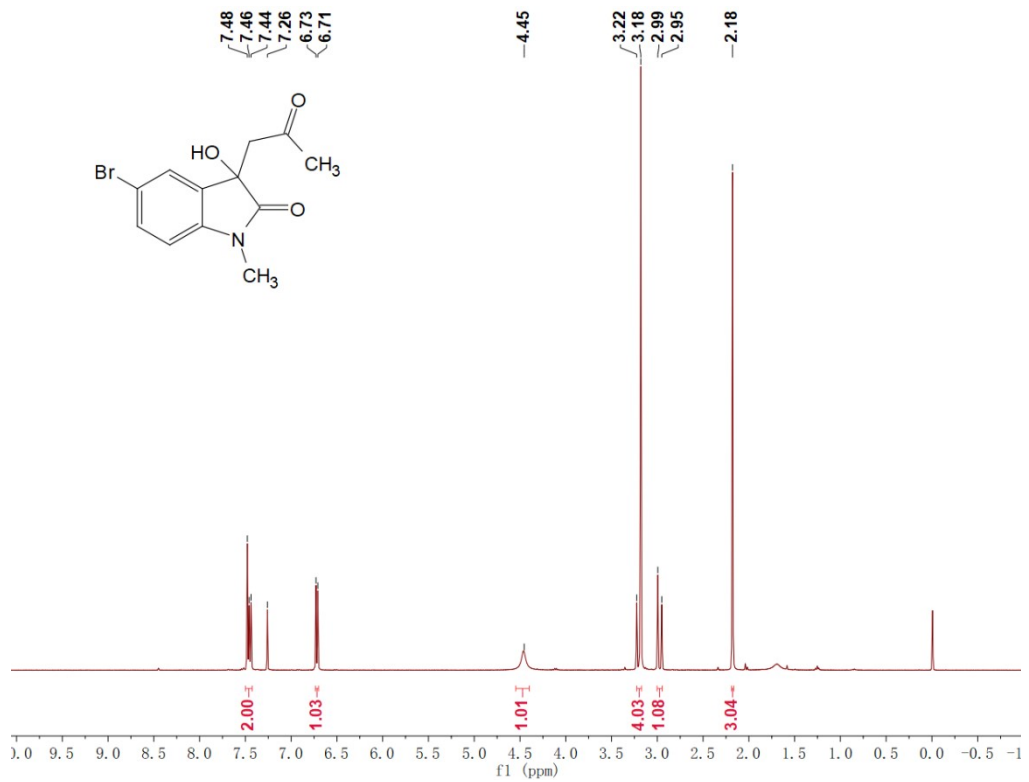

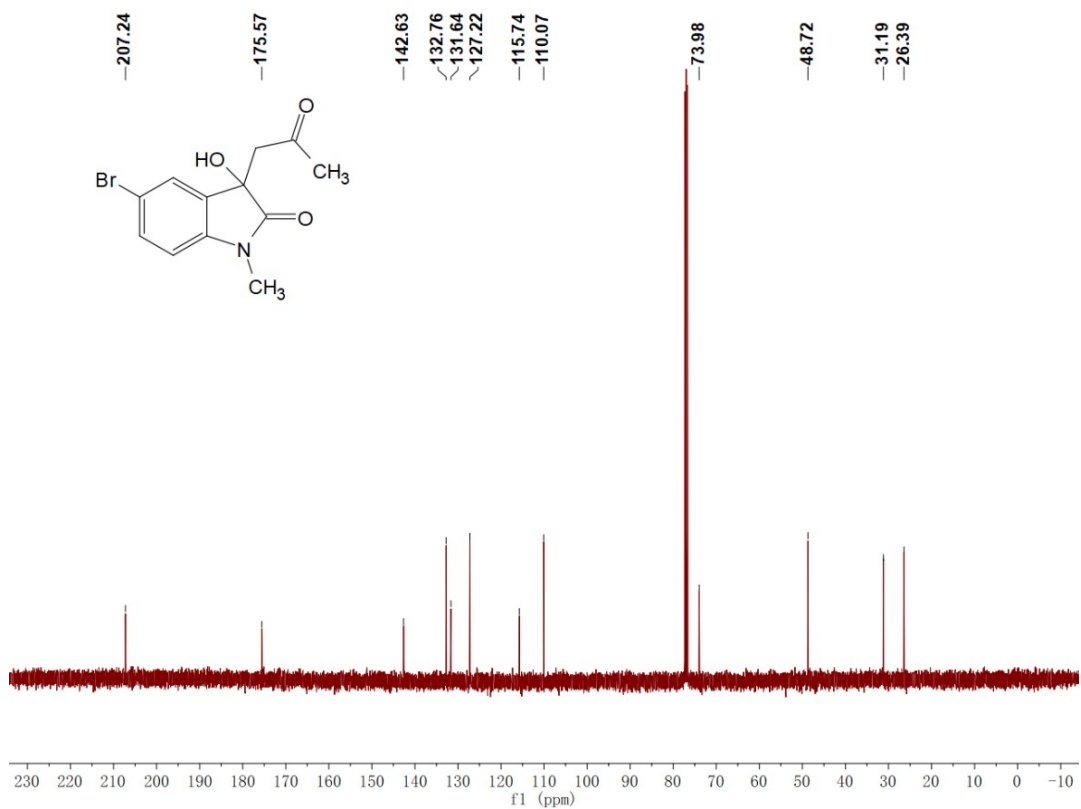

**6-bromo-3-hydroxy-1-methyl-3-(2-oxopropyl)indolin-2-one (3k)**

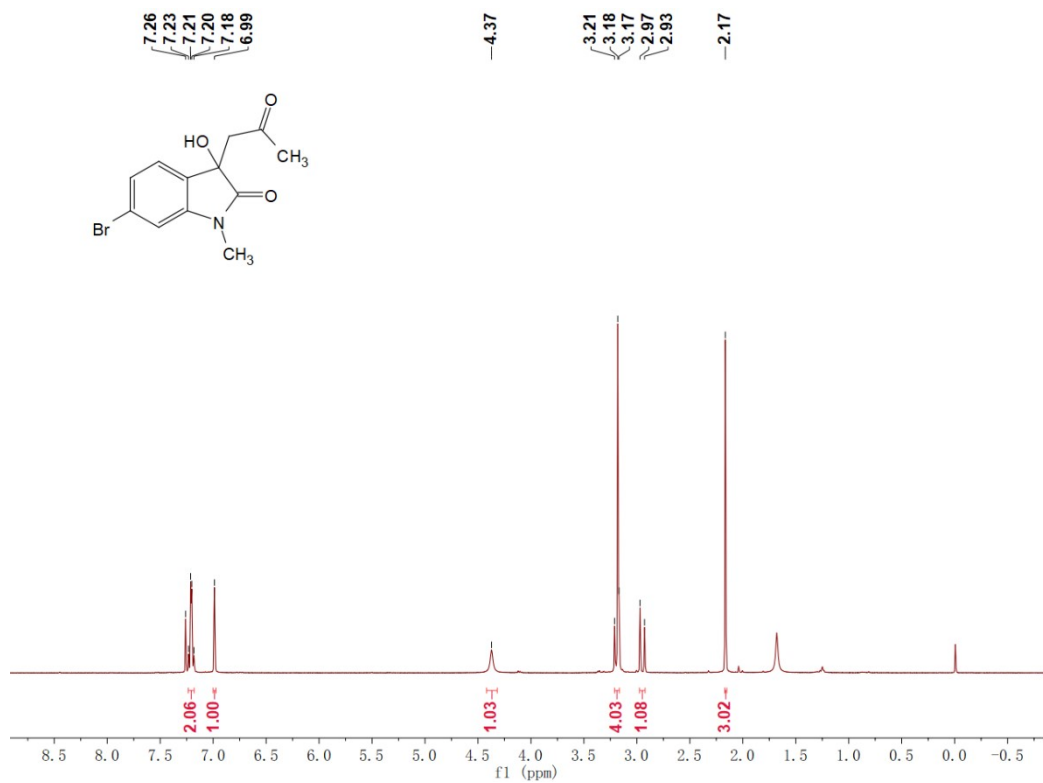

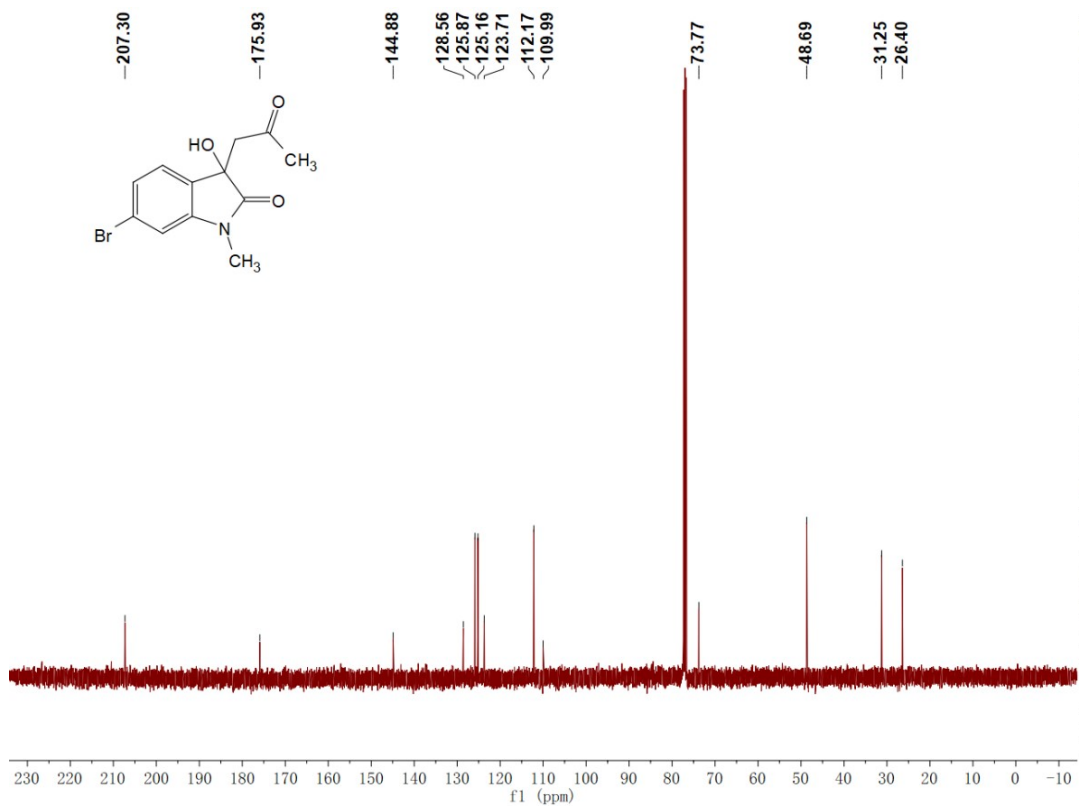

### 7-bromo-3-hydroxy-1-methyl-3-(2-oxopropyl)indolin-2-one (3l)

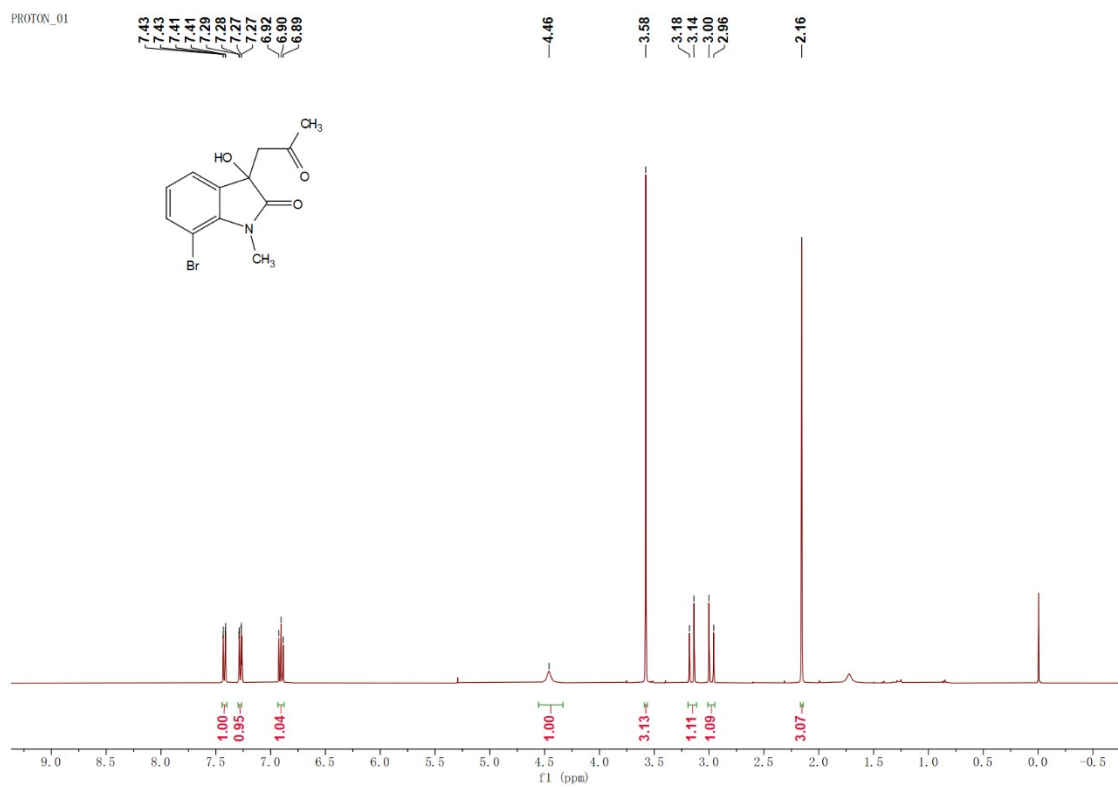

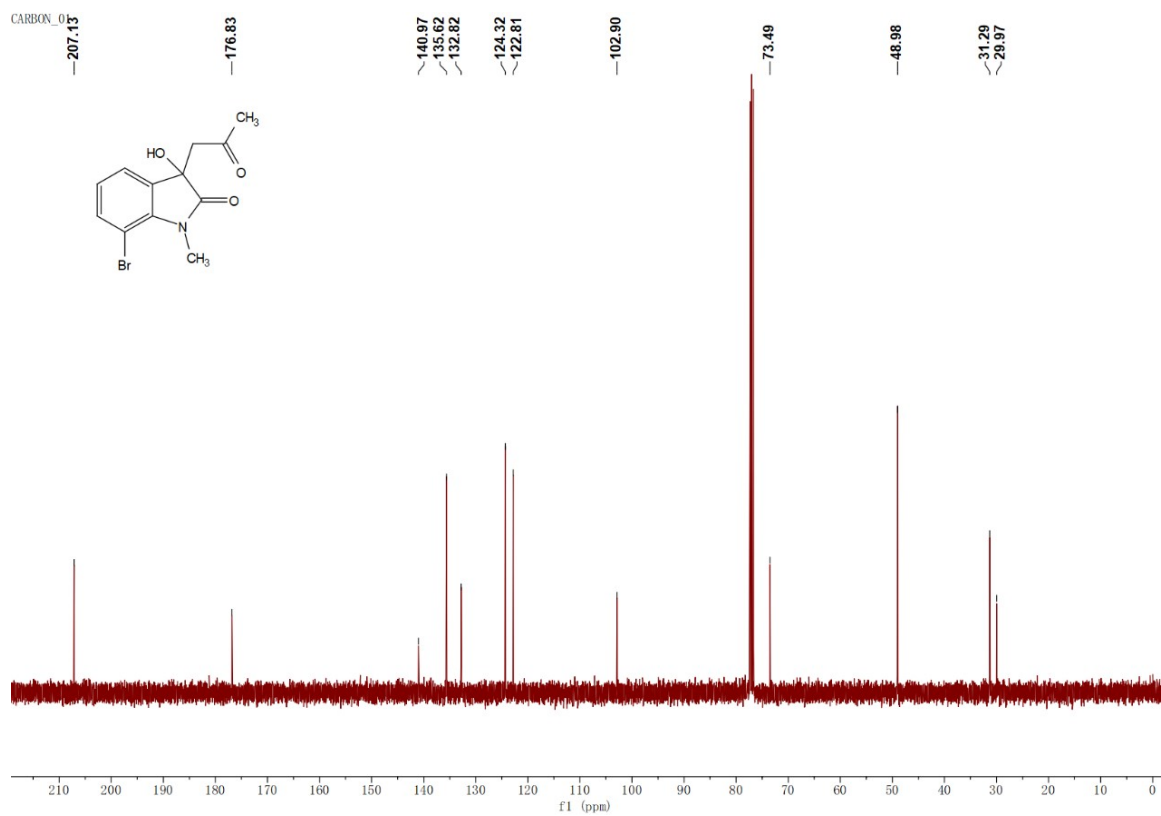

**hydroxy-1,5-dimethyl-3-(2-oxopropyl)indolin-2-one (3m)**

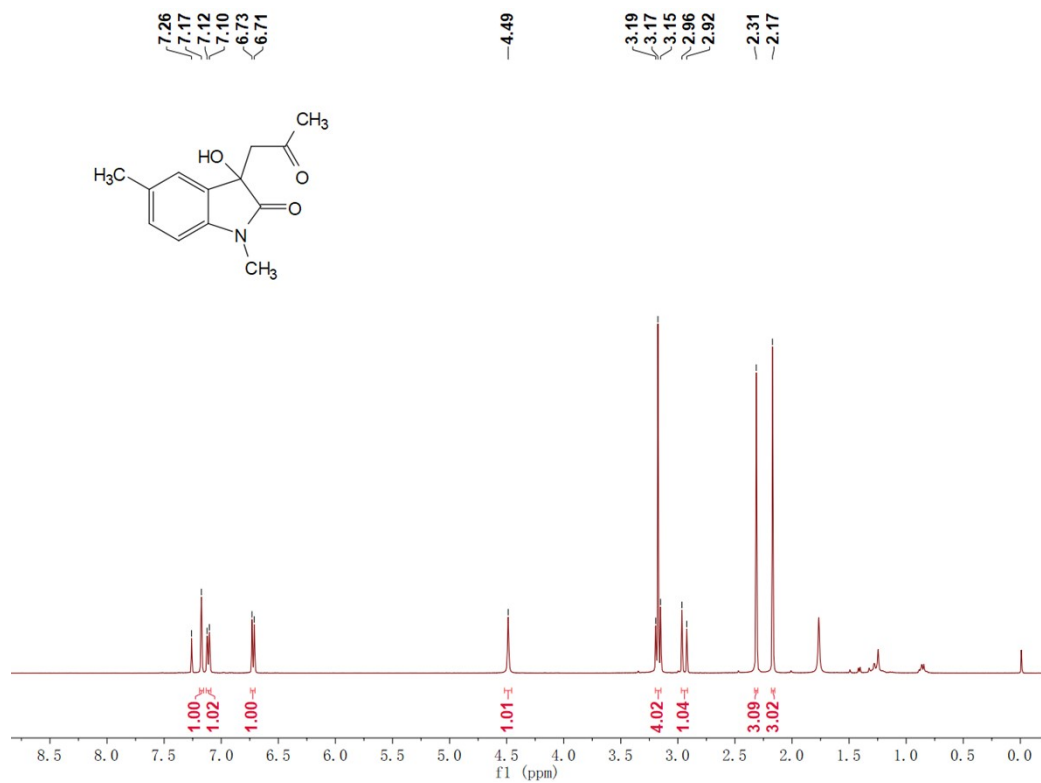

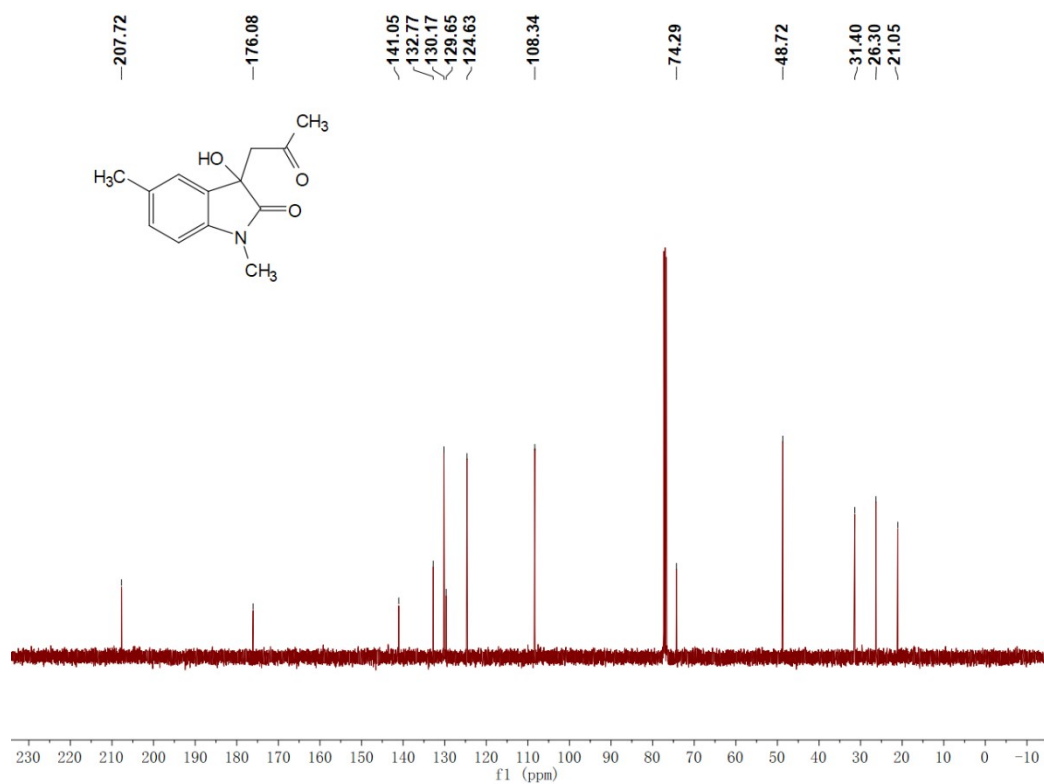

### 3-hydroxy-1,6-dimethyl-3-(2-oxopropyl)indolin-2-one (3n)

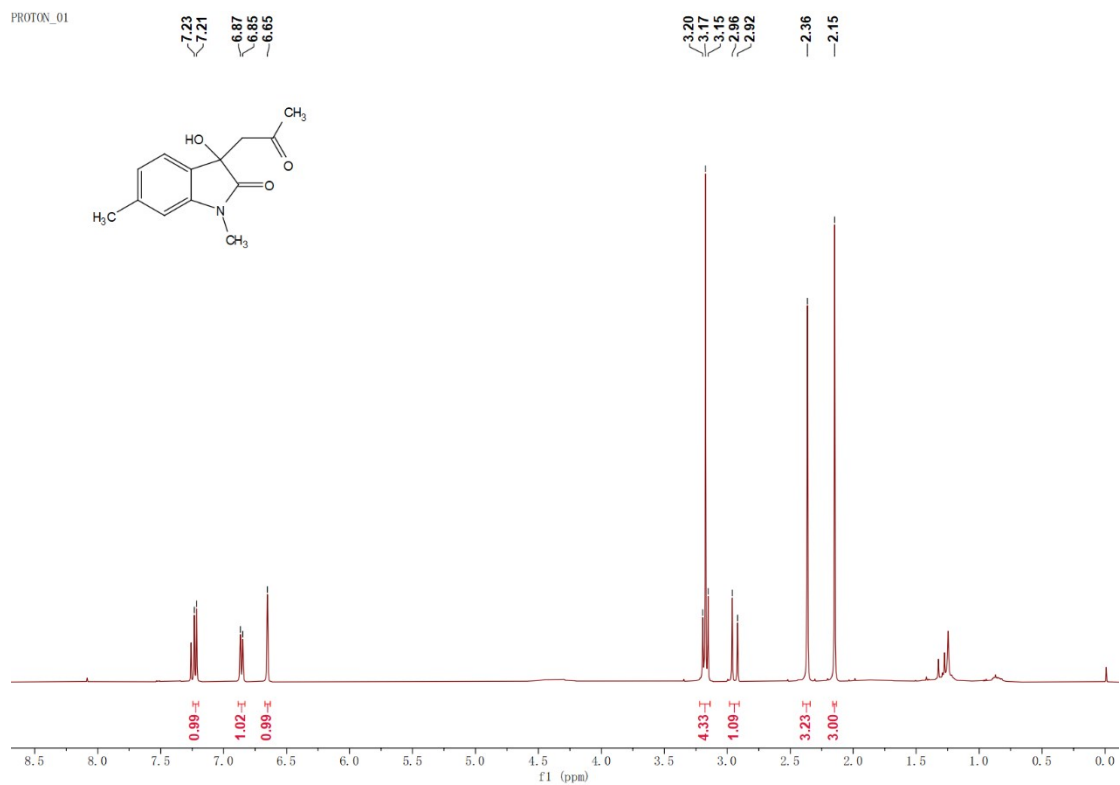

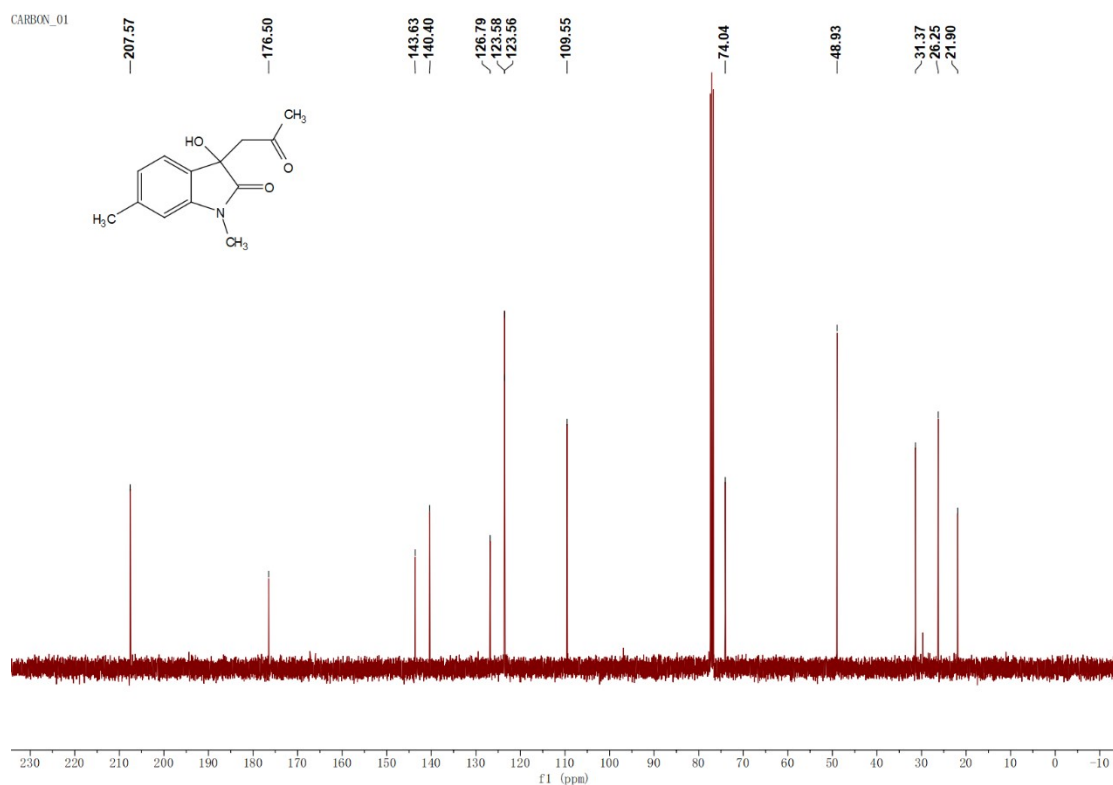

### 3-hydroxy-1,7-dimethyl-3-(2-oxopropyl)indolin-2-one (3o)

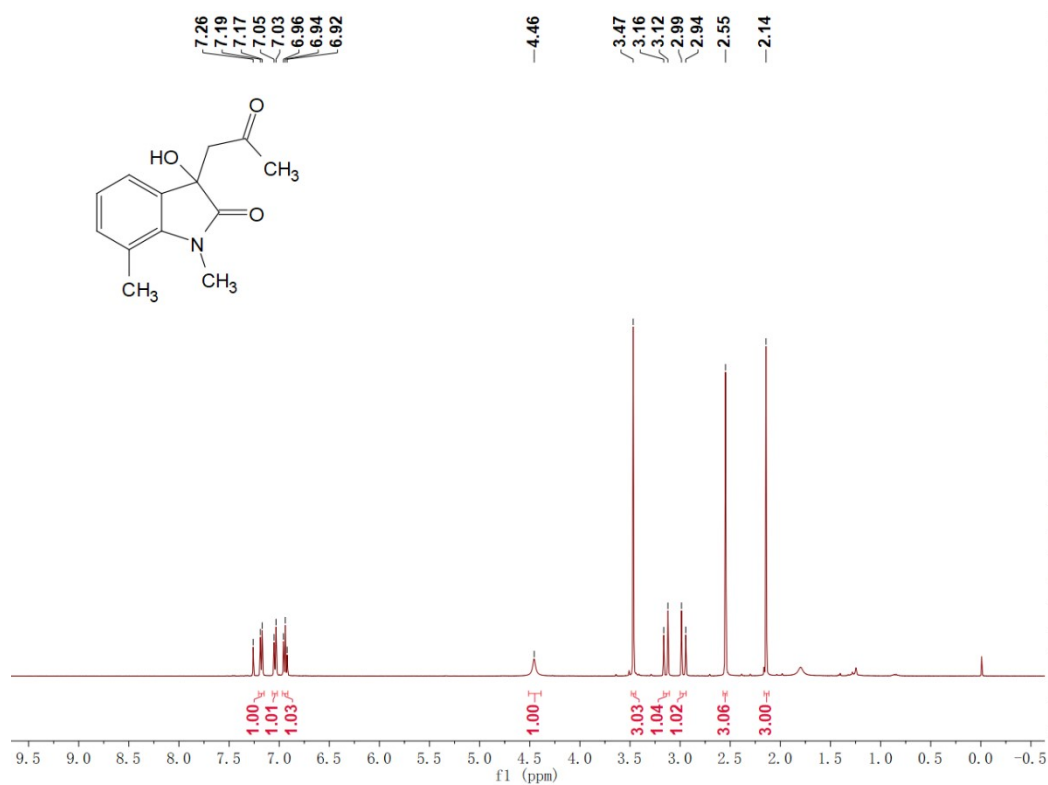

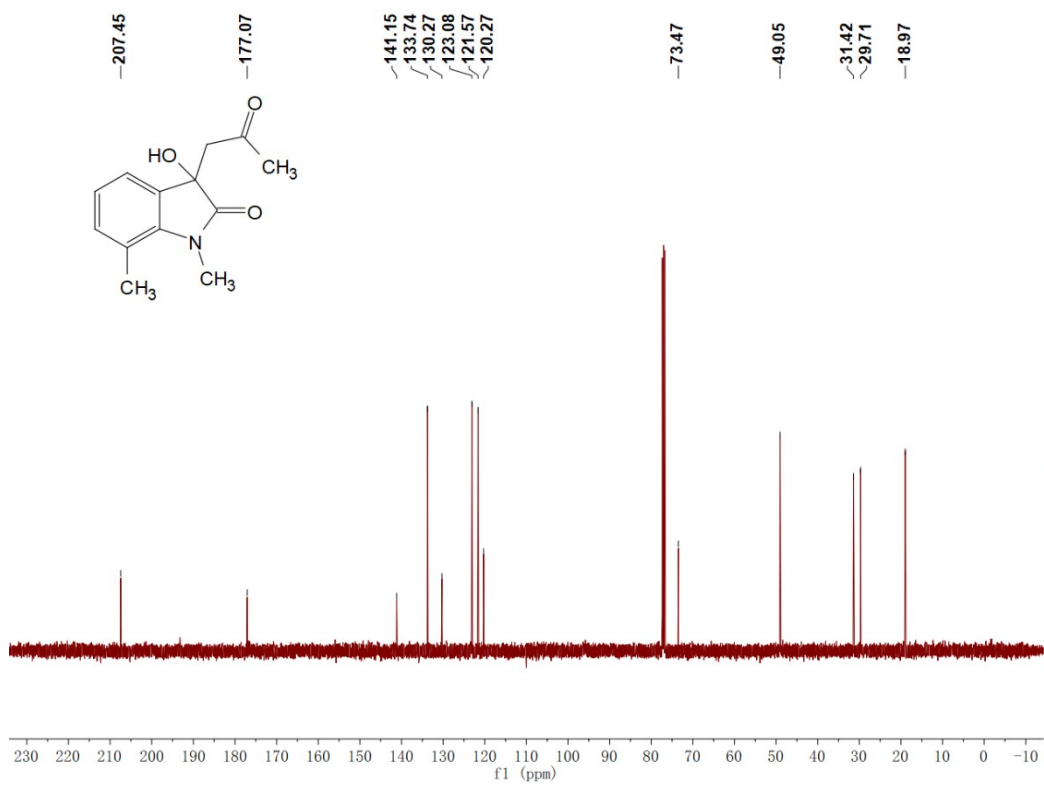

### 3-hydroxy-5-methoxy-1-methyl-3-(2-oxopropyl)indolin-2-one (

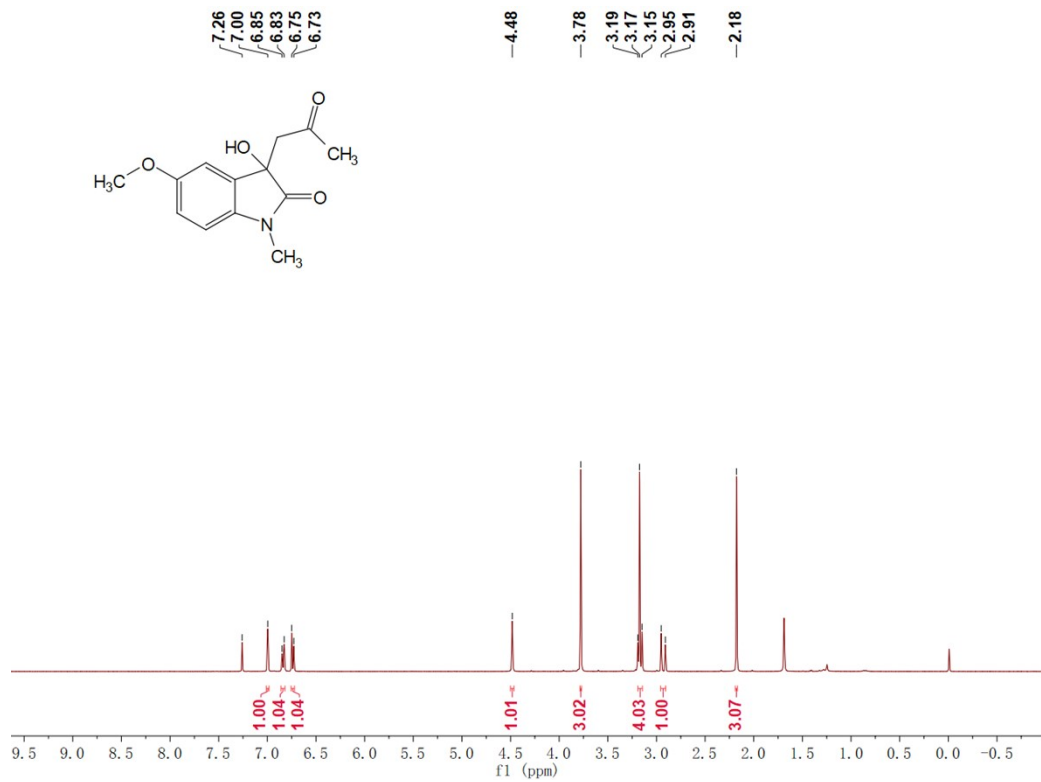



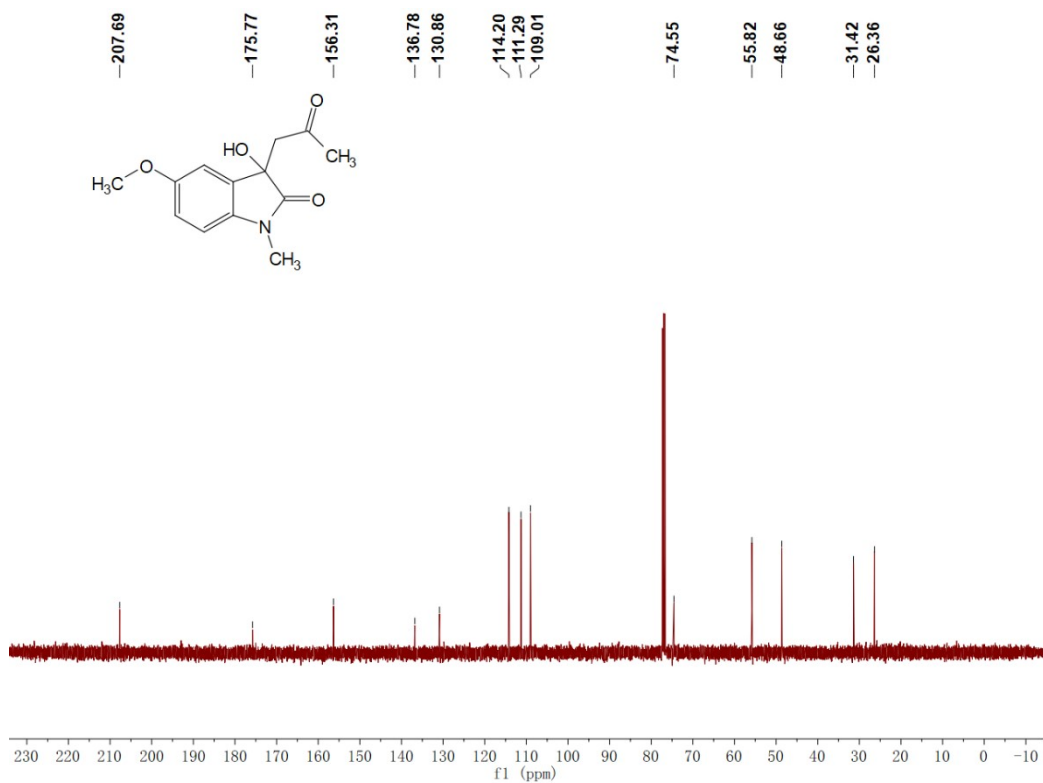

### 3-hydroxy-5-methoxy-1-methyl-3-(2-oxopropyl)indolin-2-one (3q)

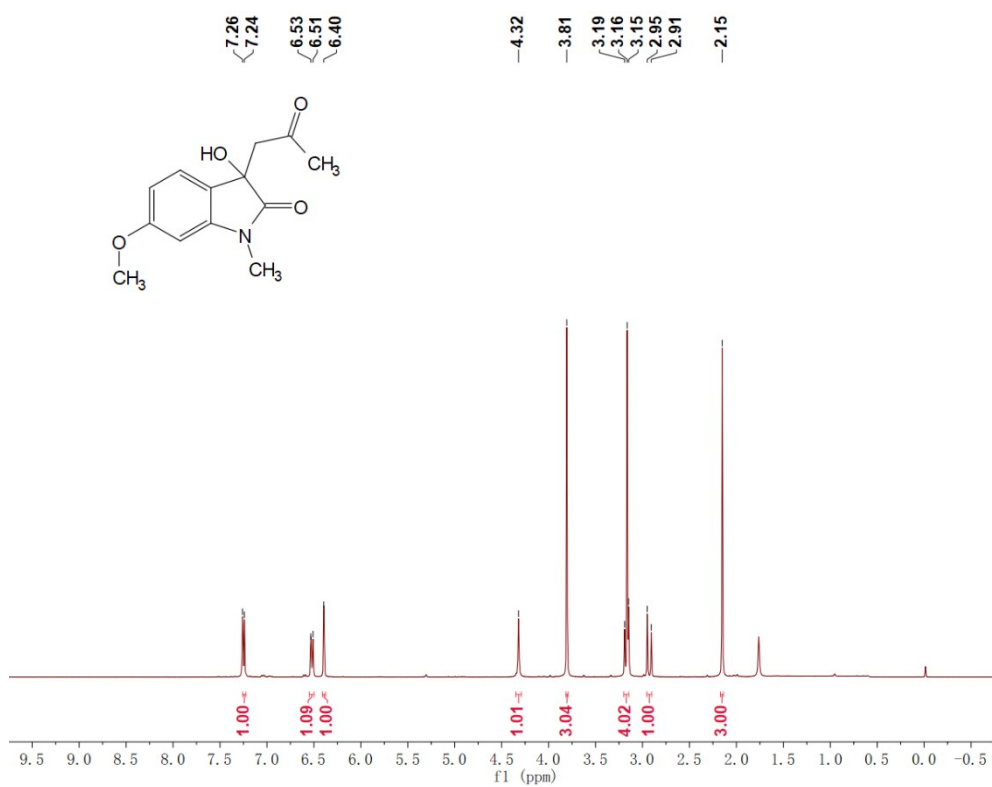

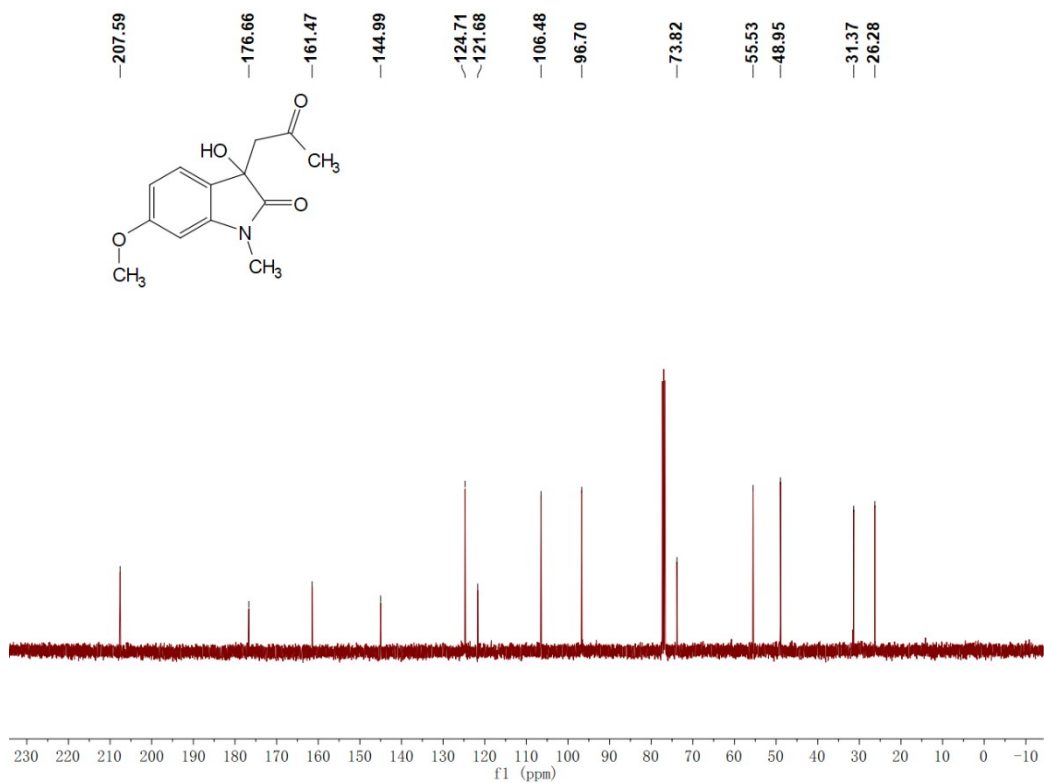

### 1-ethyl-3-hydroxy-3-(2-oxopropyl)indolin-2-one (3r)

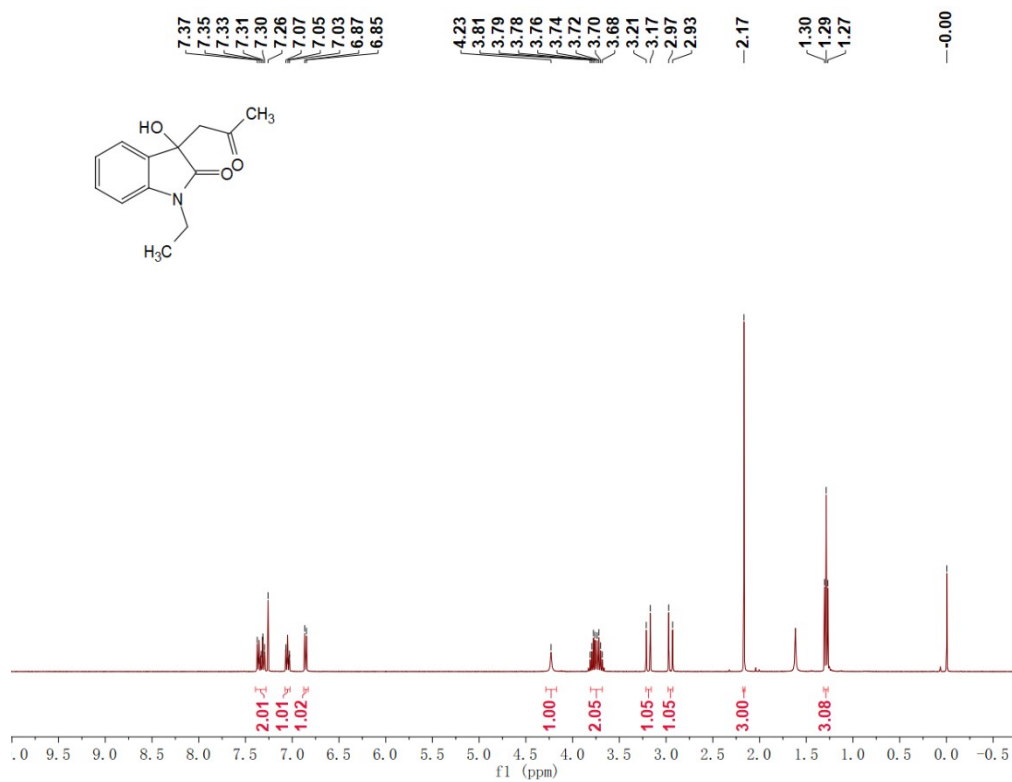

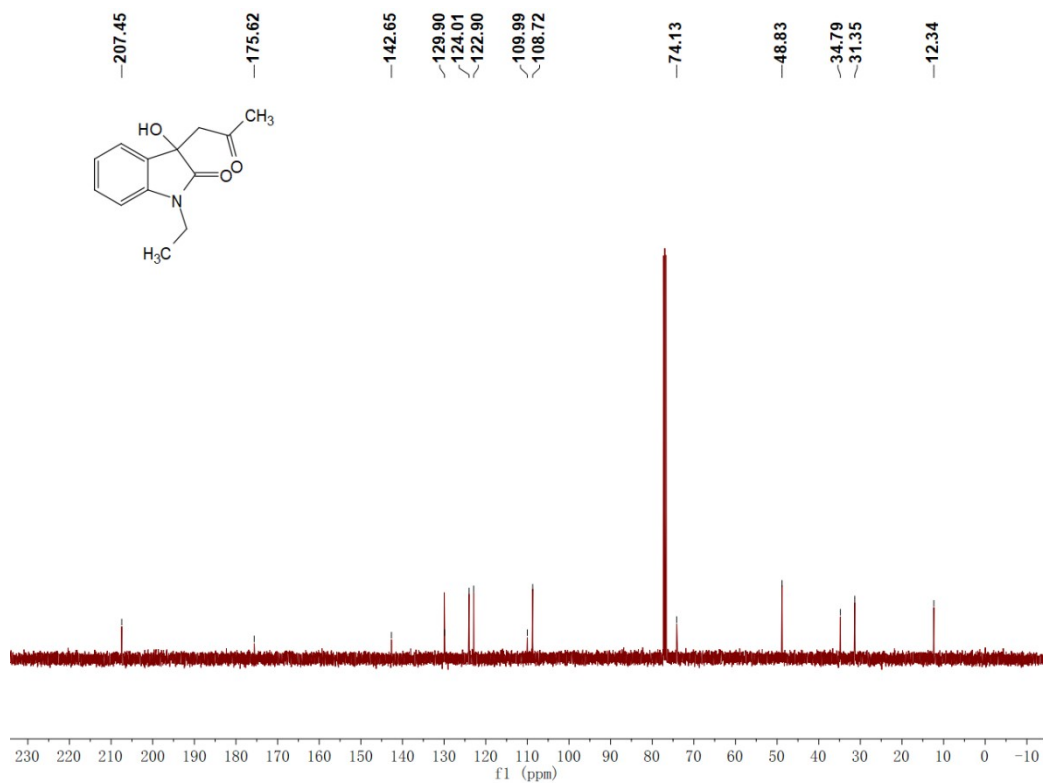

### 3-hydroxy-3-(2-oxopropyl)-1-phenylindolin-2-one (3s)

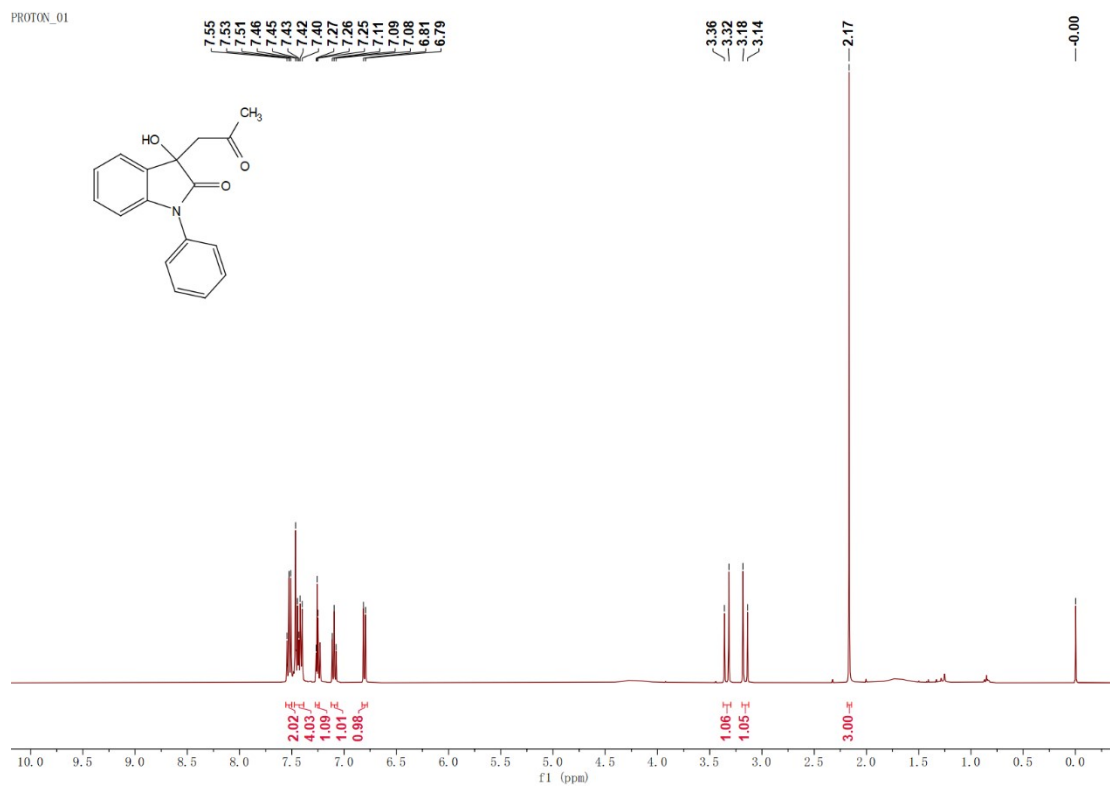

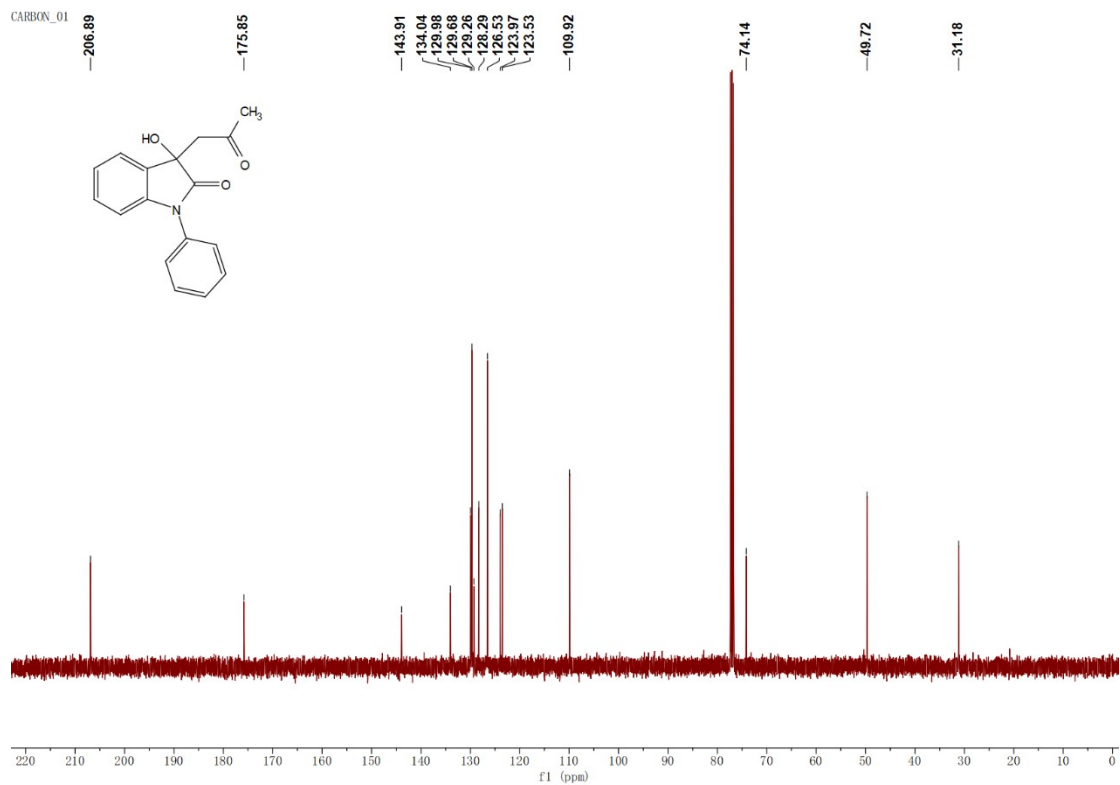

### N-methyl isatin (1a')

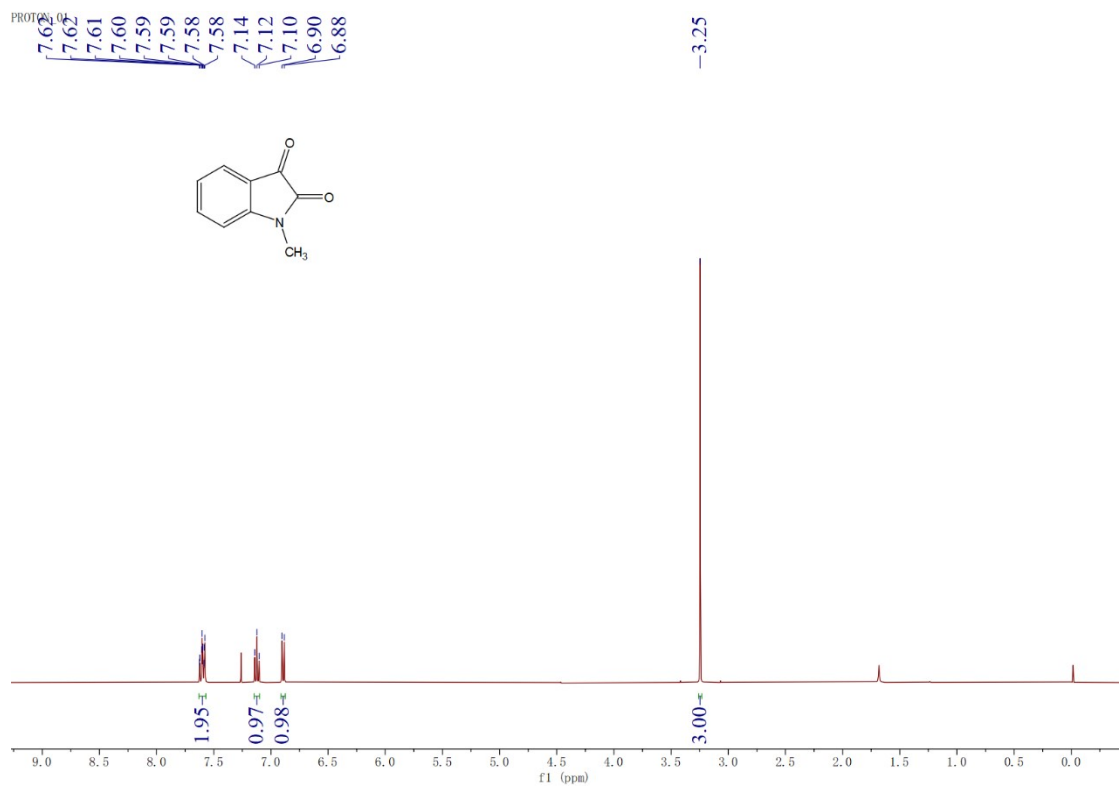

CARBON\_01

-183.39

-158.24

-151.45

-138.50

-125.36

-123.93

-117.41

-110.00

-26.23

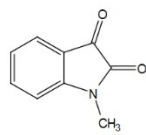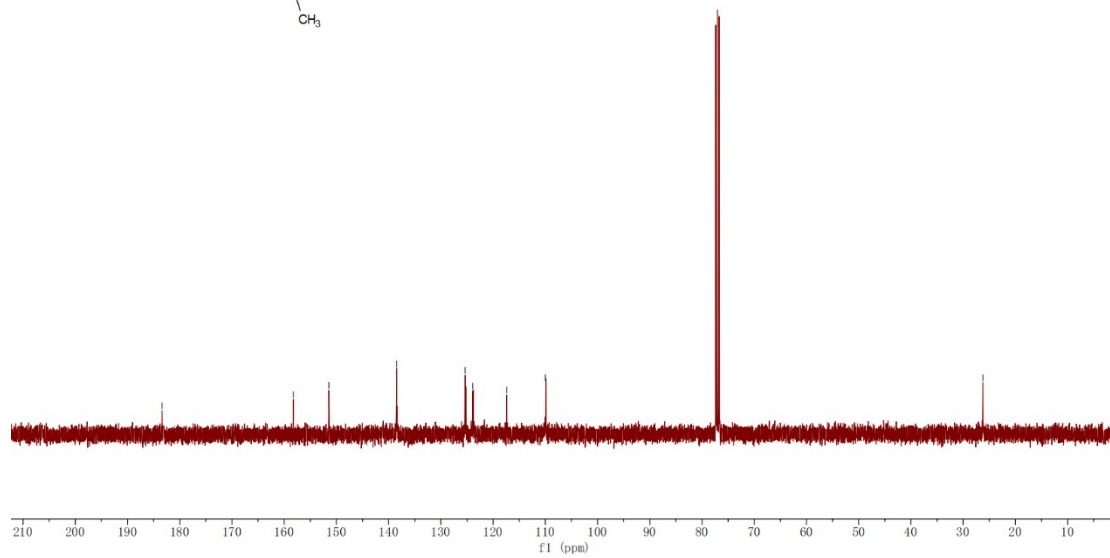

Supplement: d4qo00371c1.pdf [file d4qo00371c1.pdf]
